1 Evolutionary pathways to antibiotic resistance are dependent upon environmental  
2 structure and bacterial lifestyle

3 Alfonso Santos-Lopez\*<sup>1</sup>, Christopher W. Marshall\*<sup>1</sup>, Michelle R. Scribner<sup>1</sup>, Daniel  
4 Snyder<sup>1,2</sup> and Vaughn S. Cooper<sup>1,2,3</sup>

5

6 <sup>1</sup>*Department of Microbiology and Molecular Genetics, and Center for Evolutionary  
7 Biology and Medicine, University of Pittsburgh, Pittsburgh, Pennsylvania, USA.*

8 <sup>2</sup>*Microbial Genome Sequencing Center, University of Pittsburgh, Pittsburgh,  
9 Pennsylvania, USA.*

10 <sup>3</sup>*Center for Evolutionary Biology and Medicine, University of Pittsburgh, Pittsburgh,  
11 Pennsylvania, USA.*

12

13

14 \*A.S-L. and C.W.M. contributed equally to this manuscript

15 **Abstract**

16 Bacterial populations vary in their stress tolerance and population structure depending  
17 upon whether growth occurs in well-mixed or structured environments. We hypothesized  
18 that evolution in biofilms would generate greater genetic diversity than well-mixed  
19 environments and lead to different pathways of antibiotic resistance. We used  
20 experimental evolution and whole genome sequencing to test how the biofilm lifestyle  
21 influenced the rate, genetic mechanisms, and pleiotropic effects of resistance to  
22 ciprofloxacin in *Acinetobacter baumannii* populations. Both evolutionary dynamics and  
23 the identities of mutations differed between lifestyle. Planktonic populations experienced  
24 selective sweeps of mutations including the primary topoisomerase drug targets, whereas  
25 biofilm-adapted populations acquired mutations in regulators of efflux pumps. An overall  
26 trade-off between fitness and resistance level emerged, wherein biofilm-adapted clones  
27 were less resistant than planktonic but more fit in the absence of drug. However, biofilm  
28 populations developed collateral sensitivity to cephalosporins, demonstrating the clinical  
29 relevance of lifestyle on the evolution of resistance.

## 30 **Introduction**

31 Antimicrobial resistance (AMR) is one of the main challenges facing modern medicine.  
32 The emergence and rapid dissemination of resistant bacteria is decreasing the  
33 effectiveness of antibiotics and it is estimated that 700,000 people die per year due to  
34 AMR-related problems (O'Neill, 2016). AMR, like all phenotypes, is an evolved  
35 property, either the ancient product of living amidst other microbial producers of  
36 antimicrobials (Martínez, 2008), or the recent product of strong selection by human  
37 activities for novel resistance-generating mutations (Ventola, 2015).

38

39 The dominant mode of growth for most microbes is on surfaces, and this biofilm lifestyle  
40 is central to AMR (Ahmed, Porse, Sommer, Hoiby, & Ciofu, 2018; Hoiby, Bjarnsholt,  
41 Givskov, Molin, & Ciofu, 2010; Olsen, 2015), especially in chronic infections (Wolcott,  
42 2017; Wolcott et al., 2010). However, with few exceptions (Ahmed et al., 2018; France,  
43 Cornea, Kehlet-Delgado, & Forney, 2019; Ridenhour et al., 2017), most of the research  
44 on the evolution of AMR has been conducted in well-mixed populations [reviewed in  
45 (Hughes & Andersson, 2017)] or on agar plates (Michael Baym et al., 2016), conditions  
46 that cannot simulate the effects of biofilms on the evolution of AMR. Consequently, our  
47 understanding of how this lifestyle influences the evolution of AMR, whether by different  
48 population-genetic dynamics or molecular mechanisms, is limited. One example is that  
49 the close proximity of cells in biofilms may facilitate the horizontal transfer and  
50 persistence of resistance genes in bacterial populations (Ridenhour et al., 2017; Stalder &  
51 Top, 2016). Less appreciated is the potential for the biofilm lifestyle to influence the  
52 evolution of AMR by *de novo* chromosomal mutations. This emergence of AMR in  
53 biofilms is important because: i) the environmental structure of biofilms can increase  
54 clonal interference, rendering selection less effective and enhancing genetic diversity

55 (Cooper, Staples, Traverse, & Ellis, 2014; Ellis, Traverse, Mayo-Smith, Buskirk, &  
56 Cooper, 2015; France et al., 2019; Habets, Rozen, Hoekstra, & de Visser, 2006; Traverse,  
57 Mayo-Smith, Poltak, & Cooper, 2013), ii) distinct ecological conditions within the  
58 biofilm can favor functionally distinct adaptations to different niches (Poltak & Cooper,  
59 2011), iii) the biofilm itself can protect its residents from being exposed to external  
60 stresses like antibiotics or host immunity (Eze, Chenia, & El Zowalaty, 2018; E. Geisinger  
61 & Isberg, 2015), and iv) slower growth within biofilms can reduce the efficacy of  
62 antibiotics that preferentially attack fast-growing cells (Kirby, Garner, & Levin, 2012;  
63 Walters, Roe, Bugnicourt, Franklin, & Stewart, 2003). The first two hypotheses would  
64 predict more complex evolutionary dynamics within biofilms than in well-mixed  
65 environments (Steenackers, Parijs, Foster, & Vanderleyden, 2016), while the second two  
66 predict different rates of evolution, targets of selection, and likely less potent mechanisms  
67 of AMR (Andersson & Hughes, 2014). Together, these potential factors call into question  
68 the conventional wisdom of a tradeoff between fitness and antimicrobial resistance, a  
69 relationship that remains to be clearly defined.

70

71 Here, we study the evolutionary dynamics and effects of new resistance mutations in the  
72 opportunistic nosocomial pathogen *Acinetobacter baumannii*, which is often intrinsically  
73 resistant to antibiotics or has been reported to rapidly evolve resistance to them (Doi,  
74 Murray, & Peleg, 2015). This pathogen is categorized as one of the highest threats to  
75 patient safety (Asif, Alvi, & Rehman, 2018), partly due to its ability to live on inanimate  
76 surfaces in biofilms (Eze et al., 2018). We experimentally propagated populations of *A.*  
77 *baumannii* exposed either to subinhibitory or increasing concentrations of ciprofloxacin  
78 (CIP) over 80 generations in biofilm or planktonic conditions to ascertain whether these  
79 lifestyles select for different mechanisms of AMR. Rather than focusing on the genotypes

80 of single isolates, which can limit the scope of an analysis, we conducted whole-  
81 population genomic sequencing over time to define the dynamics of adaptation and the  
82 fitness of certain resistance alleles compared to others in the experiment. We then  
83 identified clones with specific genotypes that we linked to fitness and resistance  
84 phenotypes. This approach sheds new light on the ways that pathogens adapt to antibiotics  
85 while growing in biofilms and has implications for treatment decisions.

86

## 87 **Results and Discussion**

### 88 **1. Experimental evolution**

89 Replicate cultures of the susceptible *A. baumannii* strain ATCC 17978 (Baumann,  
90 Doudoroff, & Stanier, 1968; Piechaud & Second, 1951) were established under  
91 planktonic or biofilm conditions in one of three treatments: i) no antibiotics, ii) sub-  
92 inhibitory concentration of the antibiotic ciprofloxacin (CIP) and iii) evolutionary rescue  
93 (Bell & Gonzalez, 2009) in which CIP concentrations were increased every 72 hours from  
94 subinhibitory concentrations to four times the minimum inhibitory concentration (MIC)  
95 (Figure 1A). Before the start of the antibiotic evolution experiment, we propagated the  
96 ATCC strain for ten days in planktonic conditions to reduce the influence of adaptation  
97 to the laboratory conditions on subsequent comparisons. CIP was chosen because of its  
98 clinical importance in treating *A. baumannii* (Ardebili, Lari, & Talebi, 2014; Doi et al.,  
99 2015; Lopes & Amyes, 2013), its ability to penetrate the biofilm matrix (Tseng et al.,  
100 2013) allowing similar efficacy in well mixed and structured populations (Kirby et al.,  
101 2012), and because it is not known to stimulate biofilm formation in *A. baumannii* (Aka  
102 & Haji, 2015). Planktonic populations were serially passaged by daily 1:100 dilution  
103 while biofilm populations were propagated using a bead model simulating the biofilm life  
104 cycle (Poltak & Cooper, 2011; Traverse et al., 2013; Turner, Marshall, & Cooper, 2018).

105 This model selects for bacteria that attach to a 7 mm polystyrene bead, form a biofilm,  
106 and then disperse to colonize a new bead each day. (A video tutorial for this protocol is  
107 available at <http://evolvingstem.org>). The transfer population size in biofilm and in  
108 planktonic cultures was set to be nearly equivalent at the beginning of the experiment  
109 (approximately  $1 \times 10^7$  CFU/mL), because population size influences mutation availability  
110 and the response to selection (Cooper, 2018; Salverda, Koomen, Koopmanschap, Zwart,  
111 & de Visser, 2017). The mutational dynamics of three lineages from each treatment were  
112 tracked by whole-population genomic sequencing (Figure 1A). We also sequenced 49  
113 single clones isolated from 22 populations at the end of the 12-day experiment to  
114 determine mutation linkage.

115

## 116 **2. Evolution of CIP resistance**

117 The rate and extent of evolved resistance depends on the strength of antibiotic selection  
118 (Andersson & Hughes, 2014; Oz et al., 2014), the distribution of fitness effects of  
119 mutations that increase resistance to the drug (Maclean, Hall, Perron, & Buckling, 2010),  
120 and the population size of replicating bacteria (Cooper, 2018; Salverda et al., 2017). The  
121 mode of bacterial growth can in principle alter each of these three variables and generate  
122 different dynamics and magnitudes of AMR. In the populations exposed to the increasing  
123 concentrations of CIP (the evolutionary rescue), the magnitude of evolved CIP resistance  
124 differed between planktonic and biofilm populations. Planktonic populations became  
125 approximately 160x more resistant on average than the ancestral clone while the biofilm  
126 populations became only 6x more resistant (Figure 1B and Table S1). Planktonic  
127 populations also evolved resistance much more rapidly, becoming 10x more resistant  
128 after only 24 hours of growth in sub-inhibitory CIP. This level of resistance would have  
129 been sufficient for surviving the remainder of the experiment, but MICs continued to

130 increase at each sampling (Figure 1B). The evolution of resistance far beyond the  
131 selective requirement indicates that mutations conferring higher resistance also increased  
132 fitness in planktonic populations exposed to CIP.

133

134 In contrast, biofilm-evolved populations evolved under the evolutionary rescue regime  
135 acquired much lower levels of resistance (*ca.* 3– 7x the ancestral MIC) and primarily in  
136 a single step between days 3 and 4 (Figure 1B). In one notable exception, the MIC of  
137 biofilm population B2 increased ~50x after 3 days of selection in subinhibitory  
138 concentrations of CIP (Figure 1B), but then the resistance of this population declined to  
139 only 6x higher than the ancestral strain. This dynamic suggested that a mutant conferring  
140 high-level resistance rose to intermediate frequency but was replaced by a more fit, yet  
141 less resistant, mutant (this possibility is evaluated below).

142

143 Lower levels of resistance were observed in populations selected at constant subinhibitory  
144 concentrations of CIP. Biofilm populations were 4x more resistant than the ancestor and  
145 planktonic populations were 20x more resistant (Table S1). We can infer that biofilm  
146 growth does not select for the high-level resistance seen in planktonic populations, instead  
147 favoring mutants with low levels of resistance and better adapted to life in a biofilm. It is  
148 important to note that these MIC measurements were made in planktonic conditions  
149 according to the clinical standards (CLSI, 2007) and that these values increased when  
150 measured in biofilm (Table S2). Our results correspond with studies of clinical isolates in  
151 which those producing more biofilm (and likely having adapted in biofilm conditions)  
152 were less resistant than non-biofilm-forming isolates (Wang et al., 2018). Nevertheless,  
153 measuring growth and MIC is context-dependent (Borriello et al., 2004; Hill et al., 2005;  
154 Kirby et al., 2012), and because the biofilm environment at least partially protects cells

155 from antibiotic exposure (Table S2), it can be argued that evolved biofilm populations  
156 experienced lower CIP concentrations than planktonic populations. However, we selected  
157 CIP because it can penetrate the biofilm barrier (Tseng et al., 2013), and furthermore,  
158 cells growing in the bead model must disperse from one bead to colonize the next one in  
159 a less protected state. Overall, these results demonstrate that exposing bacteria to low  
160 levels of antibiotic risks selection for high levels of resistance that can make future  
161 treatment more difficult (Wistrand-Yuen et al., 2018).

162

### 163 **3. Evolutionary dynamics under CIP treatment**

164 In large bacterial populations ( $>10^5$  cells) growing under strong selection, adaptive  
165 mutations conferring beneficial traits such as antibiotic resistance will dominate  
166 population dynamics (Jeffrey E Barrick & Lenski, 2013; Cooper, 2018). Therefore, if a  
167 single mutation renders the antibiotic ineffective and provides the highest fitness gain, it  
168 would be expected to outcompete all other less fit mutations. Further, the stronger the  
169 selection for resistance, the greater the probability of genetic parallelism among replicate  
170 populations (Bolnick, Barrett, Oke, Rennison, & Stuart, 2018). Under the conditions of  
171 these experiments, approximately  $10^6$  mutations occur in the first growth cycle and  
172 roughly  $10^7$  mutations arise over the 12 days of selection, leading to a probability of 0.98  
173 that every site in the 4Mbp *A. baumannii* genome experiences a mutation at least once  
174 over the course of the 12-day experiment (see Table S3 for details of these calculations).  
175 The dramatic differences in the evolved resistance levels of planktonic and biofilm  
176 populations suggested distinct genetic causes of resistance resulting from different  
177 selective forces in these treatments. We also predicted greater genetic diversity in the  
178 biofilm treatments, owing to spatial structure and/or niche differentiation (Traverse et al.,  
179 2013), than in the planktonic cultures, in which we expected selective sweeps (Jeffrey E.



180 Barrick et al., 2009). A signature of spatial structure alone might be different mutations  
181 in the same gene with predicted similar function coexisting over time, which is a form of  
182 clonal interference (de Visser & Rozen, 2006). A signature of niche differentiation might  
183 be the coexistence of mutations in different genes with unique functions, which is a form  
184 of adaptive radiation (Kassen, 2009).

185

186 We conducted whole-population genomic sequencing of three replicates per treatment to  
187 identify all contending mutations above a detection threshold of 5% (see Methods). The  
188 spectrum of mutations from CIP-treated populations are consistent with expectations  
189 from strong positive selection on altered or disrupted coding sequences (see Table 1 for  
190 day-12 results and Table S4 for dynamics across the experiment). High nonsynonymous  
191 to synonymous mutation ratios were observed in both lifestyles (8.5 in planktonic and 9.7  
192 in biofilm). 43% of the total mutations in planktonic and 34% in biofilm were insertions  
193 or deletions, which is vastly enriched over typical mutation rates of ~10 SNPs/indel under  
194 neutral conditions (Dillon, Sung, Sebra, Lynch, & Cooper, 2017; Lynch et al., 2016).  
195 Roughly 30% of the mutations in CIP-treated populations of either lifestyle occurred in  
196 intergenic regions (30% in planktonic-propagated populations and 32% in biofilm). Of  
197 the intergenic mutations, 72% of the planktonic mutations and 18% of the biofilm  
198 mutations occurred in promoters, 5' untranslated regions, or in putative terminators  
199 (Kröger et al., 2018).

200

201 As expected from theory, in CIP-selected planktonic populations where selection is most  
202 efficient, one or two mutations rapidly outcompeted others and fixed (Figure 2). Selection  
203 in biofilms, however, produced fewer selective sweeps and maintained more contending  
204 mutations, especially at lower antibiotic concentrations. In one population, multiple

205 mutations in the same locus (*adeL*) rose to high frequency and persisted, which is  
206 consistent with the effect of population structure alone. In the other two populations,  
207 mutations in different efflux pumps (*adeL*, *adeS*, *adeN*) contended during the experiment,  
208 which could be explained by population structure or ecological diversification, if these  
209 mutations produced different phenotypes. Overall, across all treatments and timepoints,  
210 biofilm-adapted populations were significantly more diverse than the planktonic-adapted  
211 populations (Shannon index; Kruskal Wallis, chi-squared = 7.723, p = 0.005), particularly  
212 at subinhibitory concentrations of CIP (Figure S1A). Notably, increasing drug  
213 concentrations eliminated the differences in diversity between treatments (Figure S1B),  
214 but the greater diversity in biofilms treated with lower doses generated more diversity for  
215 selection to act upon in a changing environment. This higher standing diversity is  
216 important when considering dosing and when antibiotic exposure may be low (*e.g.* in the  
217 external environment or when bound to tissues) (Baquero, Negri, Morosini, & Blazquez,  
218 1998; Khan, Berglund, Khan, Lindgren, & Fick, 2013) because biofilms with more allelic  
219 diversity have a greater chance of survival to drug and immune attack (Fux, Costerton,  
220 Stewart, & Stoodley, 2005).

221

222 In contrast with the data observed in the populations evolving under CIP pressure, drug-  
223 free control populations contained no mutations that achieved high frequency during the  
224 experiment (Figures 2C and 2D). These results suggest that the ancestral starting clone  
225 was already well-adapted to our experimental conditions, likely because we had  
226 previously propagated the *A. baumannii* ATCC 17978 clone under identical drug-free  
227 conditions for 10 days. This preadaptation phase led to the fixation of mutations in three  
228 genes (Table S5).

229

#### 230 **4. Lifestyle determines the selected mechanisms of resistance**

231 *A. baumannii* clinical samples acquire resistance to CIP by two principal mechanisms:  
232 modification of the direct antibiotic targets — gyrase A or B and topoisomerase IV — or  
233 by the overexpression of efflux pumps reducing the intracellular concentrations of the  
234 antibiotic (Doi et al., 2015). To directly associate genotypes with resistance phenotypes,  
235 we sequenced 49 clones isolated at the end of the experiment, the majority of which were  
236 selected to delineate genotypes in the evolutionary rescue populations (Figures 2F and  
237 S2).

238

239 Both the genetic targets and mutational dynamics of selection in planktonic and biofilm  
240 environments differed. Mutations disrupting three negative regulators of efflux pumps  
241 evolved in parallel across populations exposed to CIP, but mutations in two of these (*adeL*  
242 and *adeS*) were nearly exclusive to biofilm clones (Figure 2F). The most common and  
243 highest frequency mutations observed in the biofilm populations were in the repressor  
244 gene *adeL* (Figures 2F, S2, and Table S6), which regulates AdeFGH, one of three  
245 resistance-nodulation-division (RND) efflux pump systems in *A. baumannii* (Coyne,  
246 Rosenfeld, Lambert, Courvalin, & Perichon, 2010; Fernando, Zhanel, & Kumar, 2013;  
247 Pournaras, Koumaki, Gennimata, Kouskouni, & Tsakris, 2016). In the planktonic lines,  
248 the predominant mutations were found in *adeN*, which is a negative regulator of AdeIJK  
249 and were mainly insertions of IS701 that disrupted the gene (X.-Z. Li, C. A. Elkins, & H.  
250 I. Zgurskaya, 2016).

251

252 In biofilm lines, different contending *adeL* mutations were detected in each replicate after  
253 24 hours then eventually fixed as CIP concentrations increased (green lines in Figure 2B),  
254 sometimes along with a secondary *adeL* mutation. This pattern suggests that altering

255 efflux via *adeL* generates adaptations to the combination of CIP and biofilm which is  
256 supported by the increase in biofilm formation by the *adeL* mutants (Figure S3). Further,  
257 mutants with higher resistance than necessary appear to be maladaptive in the biofilm  
258 treatment. For example, *adeN* (found more often in planktonic culture) and *adeS*  
259 mutations found simultaneously on day 3 in population B2 (Figure 2) led to a spike in  
260 resistance at that timepoint (Figure 1), but these alleles were subsequently outcompeted  
261 by *adeL* mutants that were evidently more fit despite lower planktonic resistance.

262

263 In contrast to the biofilm populations, all planktonic populations with increasing  
264 concentrations of CIP eventually acquired a single high frequency mutation in *gyrA*  
265 (S81L), the canonical ciprofloxacin-resistant mutation in DNA gyrase. These *gyrA*  
266 mutations evolved in genetic backgrounds containing either an *adeN* mutant or a *pgpB*  
267 mutant. *pgpB* is a gene that encodes a putative membrane associated lipid phosphatase  
268 and is co-regulated by *adeN* (Hua, Chen, Li, & Yu, 2014). Other mutations associated  
269 with high levels of resistance affected *parC*, encoding topoisomerase IV, and regulatory  
270 regions of two putative transporters, ACX60\_RS15145 and ACX60\_RS1613, the latter  
271 being co-transcribed with the multidrug efflux pump *abeM* (Su, Chen, Mizushima,  
272 Kuroda, & Tsuchiya, 2005). Few other mutations exceeded the 10% of the total  
273 population filter in the planktonic lines. The rapid fixation of only *adeN* and *adeN*-  
274 regulated alleles in the planktonic CIP-exposed populations indicate that *adeN* conferred  
275 higher fitness than other CIP-resistant mutations at low drug concentrations.  
276 Subsequently, at increased concentrations of CIP, on-target mutations in *gyrA* were  
277 favored in each line.

278

279 Together, our results demonstrate that bacterial lifestyle influences the evolutionary  
280 dynamics and targets of selection of AMR. Loss-of-function mutations in regulators of  
281 the *adeFGH* and *adeABC* RND efflux pumps that increased CIP resistance ~4-fold in  
282 biofilm populations treated with CIP. Adaptation by planktonic populations exposed to  
283 CIP proceeded first by altering the *adeN*-controlled *adeIJK* efflux pump and then by  
284 directly altering the targets of the fluoroquinolone, *gyrA* and *parC*, leading to much higher  
285 levels of resistance.

286

## 287 **5. Evolutionary consequences of acquiring resistance**

288 The large population sizes ( $10^7 - 10^9$  cells) and number of generations (~80) in all evolved  
289 lines mean that similar mutations very likely arose in each replicate regardless of  
290 treatment, meaning that the success of some mutations over others reflects their greater  
291 fitness in that condition (Table S3) (Cooper, 2018). Yet *de novo* acquired antibiotic  
292 resistance is often associated with a fitness cost in the absence of antibiotics [reviewed in  
293 (Vogwill & MacLean, 2015)]. The extent of this cost and the ability to compensate for it  
294 by secondary mutations (compensatory evolution) is a key attribute determining the  
295 spread and maintenance of the resistance mechanism (Maclean et al., 2010; Moore,  
296 Rozen, & Lenski, 2000; Vogwill & MacLean, 2015; Zhao & Drlica, 2002). A negative  
297 correlation between CIP resistance and fitness of resistant genotypes in the absence of  
298 antibiotics has been previously described in *Escherichia coli*, suggesting a trade-off  
299 between these traits (Basra et al., 2018; Huseby et al., 2017; Marcusson, Frimodt-Moller,  
300 & Hughes, 2009).

301

302 To determine the relationship between resistance and fitness in the absence of antibiotics  
303 in our experiment, we chose 10 clones (5 each from biofilm and planktonic populations,

304 Figures 2F and S2) with different genotypes and putative resistance mechanisms and  
305 measured their resistance and fitness phenotypes in both planktonic and biofilm  
306 conditions (Figure 3). As expected from the populations (Figure 1B), the biofilm clones  
307 much were less resistant in planktonic conditions than those evolved planktonically [MIC  
308 = 0.58 mg/L (SEM = 0.13) vs. MIC = 8.53 mg/L (SEM = 1.96), two-tailed t-test:  $p < 0.05$ ,  
309  $t = 4.048$ ,  $df = 80$ ]. However, biofilm-evolved clones were more fit relative to the  
310 ancestral strain than the planktonic-evolved clones in the absence of antibiotic (two-tailed  
311 t-test:  $p = 0.008$ ,  $t = 2.984$   $df = 18$ ) (Figure 3). Importantly, these fitness measurements  
312 were made in both planktonic and biofilm conditions, demonstrating that even in the  
313 conditions they evolved in, the planktonic selected clones were less fit as a result of  
314 antibiotic resistance trade-offs. However, one planktonic-evolved clone with mutations  
315 in both *gyrA* and *parC* exhibited no significant fitness cost and high levels of resistance.  
316 This suggests that, as in *Pseudomonas aeruginosa*, the *parC* mutation may compensate  
317 for the cost imposed by *gyrA* mutation (Kugelberg, Lofmark, Wretling, & Andersson,  
318 2005), an example of sign epistasis (Sackman & Rokyta, 2018). Overall, mutants selected  
319 in biofilm-evolved populations were less resistant than mutants selected in planktonic  
320 populations (Figure 1B) but produced more biofilm (Figure S3) and paid little or no  
321 fitness cost in the absence of antibiotics (Figures 3). This cost-free resistance implies that  
322 these subpopulations could persist in the absence of drug, limiting the treatment options  
323 and demanding new approaches to treat high fitness, resistant pathogens (Baym, Stone,  
324 & Kishony, 2016).

325

## 326 **6. Evolutionary interactions with other antibiotics**

327 When a bacterium acquires resistance to one antibiotic, the mechanism of resistance can  
328 also confer resistance to other antibiotics (cross-resistance) or increase the susceptibility

329 to other antibiotics (collateral sensitivity) (Pal, Papp, & Lazar, 2015). We tested the MIC  
330 of the evolved populations to 23 different antibiotics in planktonic conditions. We  
331 observed changes in susceptibilities to 13 of the 23 antibiotics tested, and these changes  
332 were growth mode dependent (Figure 4). For example, planktonic populations exhibited  
333 cross resistance to cefpodoxime and ceftazidime, but biofilm populations evolved  
334 collateral sensitivity to these cephalosporins. Cross-resistance was associated genetically  
335 with *adeN*, *adeS*, *gyrA* or *pgpB* mutations, and collateral sensitivity was associated with  
336 *adeL* mutations. Selection in these environments evidently favors the activation of  
337 different efflux pumps or modified targets that have different pleiotropic consequences  
338 for multidrug resistance (Podnecky et al., 2018).

339

340 The mechanisms leading to collateral sensitivity are still poorly understood but they  
341 depend on the genetic background of the strain, the nature of the resistance mechanisms  
342 (Barbosa et al., 2017; Yen & Papin, 2017), and the specific physiological context of the  
343 cells (Leus et al., 2018). In *A. baumannii*, each RND efflux pump is suggested to be  
344 specific for certain classes of antibiotics (Coyne, Courvalin, & Perichon, 2011; Leus et  
345 al., 2018; X. Z. Li, C. A. Elkins, & H. I. Zgurskaya, 2016). Similar to our results (Figure  
346 4), Yoon and collaborators demonstrated that efflux pumps AdeABC and AdeIJK,  
347 regulated by *adeS* and *adeN* respectively, increased the resistance level to some  $\beta$ -lactams  
348 when overexpressed (Yoon et al., 2015). However, production of AdeFGH, the efflux  
349 pump regulated by *adeL*, decreased resistance to some  $\beta$ -lactams and other families of  
350 antibiotics or detergents by an unknown mechanism (Leus et al., 2018; Yoon et al., 2015).  
351 Increased sensitivity to  $\beta$ -lactams with efflux overexpression has also been reported in *P.*  
352 *aeruginosa* (Azimi & Rastegar Lari, 2017), which demonstrates the urgency of  
353 understanding the physiological basis of collateral sensitivity to control AMR evolution.

354 Exploiting collateral sensitivity has been proposed to counteract the evolution of resistant  
355 populations both in bacteria (Imamovic & Sommer, 2013; Kim, Lieberman, & Kishony,  
356 2014; Nichol et al., 2019) and in cancer (Dhawan et al., 2017). Remarkably, our results  
357 show that biofilm growth, commonly thought to broaden resistance, may actually  
358 generate collateral sensitivity during treatment with CIP and potentially other  
359 fluoroquinolones.

360

## 361 **7. Clinical relevance**

362 Our results demonstrate that the mode of growth determines both the mechanism of  
363 evolved resistance and the spectrum of sensitivity to other families of antibiotics. Further,  
364 the mutations selected in our experimental conditions also play an important role in  
365 clinical isolates, as fluoroquinolone resistance mediated by plasmids in *A. baumannii*  
366 appears to be rare (Yang, Hu, Liu, Ye, & Li, 2016). The mutations S81L in *gyrA* and  
367 S80L in *parC* acquired by the sensitive ATCC 17978 strain used in this study have been  
368 reported worldwide as the primary mechanism conferring high levels of resistance to  
369 fluorquinolones in clinical isolates (Adams-Haduch et al., 2008; Dahdouh et al., 2017;  
370 W. A. Warner et al., 2016).

371

372 In addition to the on-target mechanisms of resistance through gyrase or topoisomerase  
373 mutations, *A. baumannii* isolates acquire comparatively moderate levels of  
374 fluoroquinolone resistance by modifications in various RND efflux pumps. These RND  
375 efflux pumps have overlapping yet differing substrate profiles and may act synergistically  
376 in increasing the resistance level (Table S7) (Coyne et al., 2010; Damier-Piolle, Magnet,  
377 Bremont, Lambert, & Courvalin, 2008; Fernando et al., 2013; Rosenfeld, Bouchier,  
378 Courvalin, & Perichon, 2012). In our experiment, all biofilm and planktonic populations



379 and nearly all isolated clones acquired mutations in at least one of the three regulators of  
380 the RND efflux pumps (*adeL*, *adeS*, *adeN*) or in a gene regulated by one of these  
381 regulators (*pgpB*). Mutations in *adeL* upregulate the expression of the RND efflux pump  
382 AdeFGH (Figure 2, Table S7) that is associated with a multidrug resistant phenotype in  
383 clinical isolates (Coyne et al., 2010; Fernando et al., 2013; Leus et al., 2018; Pournaras et  
384 al., 2016). AdeL-AdeFGH genes are often highly expressed in infection isolates, which  
385 could reflect adaptation to the biofilm lifestyle (Coyne et al., 2010; Fernando et al., 2013).  
386 Further, overexpression of *adeG* is predicted to enhance transport of acylated homoserine  
387 lactones, including quorum-sensing autoinducers, which can increase both drug  
388 resistance and biofilm formation (Alav, Sutton, & Rahman, 2018; He et al., 2015).  
389 However, in clinical isolates, overexpression of the AdeFGH pump is less common than  
390 the AdeIJK efflux pump that is regulated by *adeN* (Rosenfeld et al., 2012; Yoon et al.,  
391 2015). AdeIJK contributes to resistance to biocides, hospital disinfectants, and to both  
392 intrinsic and acquired antibiotic resistance in *A. baumannii* (Damier-Piolle et al., 2008;  
393 Rosenfeld et al., 2012) and may decrease biofilm formation, which could explain its  
394 prevalence in planktonic populations here (Yoon et al., 2015). Perhaps more concerning,  
395 this study demonstrates that the overexpression of RND efflux pumps as a resistance  
396 mechanism may produce little fitness cost in *A. baumannii*, as has previously been  
397 demonstrated in both *P. aeruginosa* and *Neisseria gonorrhoeae* (Olivares Pacheco,  
398 Alvarez-Ortega, Alcalde Rico, & Martínez, 2017; D. M. Warner, Folster, Shafer, & Jerse,  
399 2007).

400

## 401 **Conclusions**

402 We used experimental evolution of the opportunistic pathogen *A. baumannii* in both well-  
403 mixed and biofilm conditions to examine how lifestyle influences the dynamics, diversity,

404 identity of genetic mechanisms, and direct and pleiotropic effects of resistance to a  
405 common antibiotic. Experimental evolution is a powerful method of screening naturally  
406 arising genetic variation for mutants that are the best fit in a defined condition (Cooper,  
407 2018; Elena & Lenski, 2003; Van den Bergh, Swings, Fauvart, & Michiels, 2018). When  
408 population sizes are large and reproductive rates are rapid, as they were here, the  
409 probability that all possible single-step mutations that can increase both resistance and  
410 fitness occurred in each population is very likely. The few mutations selected here as well  
411 as their repeated order with increasing CIP concentrations demonstrates that these are the  
412 most fit mutations in this *A. baumannii* strain and set of environmental conditions. The  
413 prevalence of some of these mutations in clinical samples suggests that they too may have  
414 been exposed to selection in similar conditions. Likewise, the absence of other mutations  
415 reported in shotgun mutant screens of resistance in *A. baumannii* (Edward Geisinger et  
416 al., 2018) means that these mutants produced less resistance, lower fitness, or both.  
417 Evolution experiments hold promise for ultimately forecasting mutations selected by  
418 different antimicrobials and anticipating treatment outcomes, including the  
419 diversification of the pathogen population and the likelihood of collateral sensitivity or  
420 cross-resistance (Brockhurst et al., 2019). Furthermore, knowledge of the prevailing  
421 lifestyle of the pathogen population may be critically important for treatment design.  
422 Most infections are likely caused by surface-attached populations (Wolcott, 2017;  
423 Wolcott et al., 2010), and some treatments include cycling antibiotics that promote  
424 biofilm as a primary response. For example, tobramycin is used for treating *P. aeruginosa*  
425 in cystic fibrosis patients (Hamed & Debonnett, 2017) and promotes biofilm formation  
426 (Hoffman et al., 2005; Linares, Gustafsson, Baquero, & Martinez, 2006), wherein the  
427 evolution of antibiotic resistance without a detectable fitness cost may arise during  
428 treatment. But the more diverse biofilm-adapted lineages in our experiments revealed a

429 striking vulnerability to cephalosporins, which could provide a new strategy for  
430 treatment. Broader still, conventional wisdom has long held that the relationship between  
431 resistance and fitness is antagonistic, and that the efficacy of many antimicrobials is aided  
432 by a severe fitness cost of resistance (M. Baym et al., 2016; Hughes & Andersson, 2017;  
433 Vogwill & MacLean, 2015). This study demonstrates that the form of the relationship  
434 between fitness and resistance can be altered by the mode of growth, whereby biofilms  
435 can align resistance and fitness traits. Continued efforts to determine how the fitness  
436 landscape of various resistance pathways depends on the environment and its structure,  
437 including growth mode, could produce a valuable forecasting tool to stem the rising AMR  
438 tide.

439

## 440 **Methods**

### 441 **Experimental evolution**

442 Before the start of the antibiotic evolution experiment, we propagated well mixed tubes  
443 founded by one clone of the susceptible *A. baumannii* strain ATCC 17978-mff (Baumann  
444 et al., 1968; Piechaud & Second, 1951) in a modified M9 medium (referred to as M9<sup>+</sup>)  
445 containing 0.1 mM CaCl<sub>2</sub>, 1 mM MgSO<sub>4</sub>, 42.2 mM Na<sub>2</sub>HPO<sub>4</sub>, 22 mM KH<sub>2</sub>PO<sub>4</sub>, 21.7 mM  
446 NaCl, 18.7 mM NH<sub>4</sub>Cl and 11.1 mM glucose and supplemented with 20 mL/L MEM  
447 essential amino acids (Gibco 11130051), 10 mL/L MEM nonessential amino acids (Gibco  
448 11140050), and 1 mL each of trace mineral solutions A, B, and C (Corning 25021-3Cl).  
449 This preadaptation phase was conducted in the absence of antibiotics for 10 days (*ca.* 66  
450 generations) with a dilution factor of 100 per day.

451 After the ten days of preadaptation to M9<sup>+</sup> medium, we selected a single clone and  
452 propagated for 24 hours in M9<sup>+</sup> in the absence of antibiotic. We then subcultured this  
453 population into twenty replicate populations. Ten of the populations (5 planktonic and 5

454 biofilm) were propagated every 24 hours in constant subinhibitory concentrations of CIP,  
455 0.0625 mg/L, which corresponds to 0.5x the minimum inhibitory concentration (MIC).  
456 After 72 hours under subinhibitory concentrations of CIP, the populations were exposed  
457 to two different antibiotic regimes for 9 more days, either constant subinhibitory  
458 concentrations of CIP or increasing concentrations of CIP (called the evolutionary  
459 rescue). For the latter, we doubled the CIP concentrations every 72 hours until 4x MIC.  
460 As a control, the 20 remaining populations were propagated in the absence of CIP (Figure  
461 1).

462  
463 We propagated the populations into fresh media every 24 hours as described by Turner *et*  
464 *al.* 2018 (Turner et al., 2018). For planktonic populations, we transferred a 1:100 (50  $\mu$ l  
465 into 5 mL of M9<sup>+</sup>) dilution, which corresponded to 6.64 generations per day. For biofilm  
466 populations, we transferred a polystyrene bead (Polysciences, Inc., Warrington, PA) to  
467 fresh media containing three sterile beads. We rinsed each bead in PBS before the  
468 transfer, therefore reducing the transfer of planktonic cells. Each day we alternated  
469 between black and white marked beads, ensuring that the bacteria were growing on the  
470 bead for 24 hours, which corresponds to approximately 6 to 7.5 generations/day (Traverse  
471 et al., 2013; Turner et al., 2018). For the experiment with increasing concentrations of  
472 antibiotics, we froze a sample of each bacterial population on days 1, 3, 4, 6, 7, 9, 10 and  
473 12. In the experiment with constant exposure to subinhibitory concentrations of  
474 antibiotics, we froze the populations on days 1, 3, 4, 9, and 12. We froze the control  
475 populations at days 1, 4, 9, and 12. For planktonic populations, we froze 1 mL of culture  
476 with 9% of DMSO. For freezing the biofilm populations, we sonicated the beads in 1 mL  
477 of PBS with a probe sonicator and subsequently froze with 9% DMSO.

478

479 **Phenotypic characterization: antimicrobial susceptibility and biofilm formation**

480 We determined the MIC of CIP by broth microdilution in M9<sup>+</sup> according to the Clinical  
481 and Laboratory Standards Institute guidelines (CLSI, 2007), in which each bacterial  
482 sample was tested to 2-fold-increasing concentration of CIP from 0.0625 to 64 mg/L. To  
483 obtain a general picture of the resistance profiles we determined the MIC to 23 antibiotics  
484 (amikacin, ampicillin, ampicillin/sulbactam, aztreonam, cefazolin, cefepime,  
485 cephalothin, meropenem, ertapenem, cefuroxime, gentamicin, CIP,  
486 piperacillin/tazobactam, ceftazidime, trimethoprim/sulfamethoxazole, cefpodoxime,  
487 tobramycin, tigecycline, ticarcillin/clavulanic acid, ceftriaxone and  
488 tetracycline) by broth microdilution in commercial microtiter plates following the  
489 instructions provided by the manufacturers (Sensititre GN3F, Trek Diagnostics Inc.,  
490 Westlake, OH). We tested the MIC at days 1, 3, 4, 6, 7, 9, 10 and 12 for the populations  
491 propagated under increasing concentrations of antibiotic, and at days 1 and 12 for the  
492 subinhibitory and non-antibiotic treatments. For the CIP-MICs, we used *Pseudomonas*  
493 *aeruginosa* PAO1 in Mueller Hinton broth as a control. No differences in the MICs were  
494 found between Mueller Hinton and M9<sup>+</sup> or if measuring the MIC in 96 well-plate or in 5  
495 mL tubes, which are the experimental conditions. Each MIC was performed in triplicate.  
496 The CIP was provided by Alfa Aesar (Alfa Aesar, Wardhill, MA). We also determined  
497 the MIC of CIP in biofilm conditions adapting the method described by Díez-Aguilar to  
498 the bead model (Díez-Aguilar et al., 2018). We resuspended each clone into fresh M9<sup>+</sup>  
499 containing sterile beads (as in the experimental evolution conditions, each tube used  
500 contained three sterile beads and 5 mL of M9<sup>+</sup>). After 24 hours growing at 37°, each bead  
501 was propagated into new fresh M9<sup>+</sup> containing different CIP concentrations (from 4 to  
502 128 mg/L in 2-fold-increasing manner). After 24 growing at 37°, we rinsed each bead in  
503 PBS and sonicate them individually as explained before. 10 µl of the sonicated liquid

504 were transferred to 100  $\mu$ L of M9<sup>+</sup>. The MIC was calculated after measuring the optical  
505 density at 650 nm before and after 24 hours incubation. The inhibition of growth was  
506 defined as the lowest antibiotic that resulted in an OD difference at or below 0.05 after 6  
507 hours of incubation.

508

509 We estimated the biofilm formation of the selected clones using a modification of the  
510 previously described protocol (O'Toole & Kolter, 1998). We resurrected each clone in 5  
511 mL of M9<sup>+</sup> containing 0.5 mg/L of CIP and grew them for 24 hours. For each strain, we  
512 transferred 50  $\mu$ L into 15 mL of M9<sup>+</sup>. We tested 200  $\mu$ L of the previous dilution of each  
513 clone to 4 different subinhibitory CIP concentrations (0 mg/L, 0.01 mg/L, 0.03 mg/L and  
514 0.0625 mg/L). After 24 hours of growing at 37°C, we measured population sizes by  
515 optical density (OD) at 590nm (OD<sub>Populations</sub>). Then, we added 250  $\mu$ L of 0.1% crystal violet  
516 and incubated at room temperature for 15 minutes. After washing the wells and drying  
517 for 24 hours, we added 250  $\mu$ L 95% EtOH solution (95% EtOH, 4.95% dH<sub>2</sub>O, 0.05%  
518 Triton X-100) to each well and incubated for 15 minutes and biofilm formation was  
519 measured by the OD at 590nm (OD<sub>Biofilm</sub>). Biofilm formation was corrected by population  
520 sizes (OD<sub>Biofilm</sub>/OD<sub>Population</sub>). Results are the average of three experiments (Figure S3).

521

## 522 **Fitness measurement**

523 We selected 5 biofilm and 5 planktonic clones at the end of the evolutionary rescue  
524 experiment (Figure 2) and determined the fitness by directly competing the ancestral  
525 strain and the evolved clone variants both in planktonic and in biofilm conditions (Figure  
526 3) (Turner et al., 2018). We revived each clone from a freezer stock in M9<sup>+</sup> for 24 hours.  
527 We maintained the same evolutionary conditions to revive the clones, adding 3 beads  
528 and/or CIP to the broth when required. After 24 hours, we added equal volume of the

529 clones and the ancestors in M9<sup>+</sup> in the absence of antibiotics. For planktonic populations,  
530 we mixed 25  $\mu$ l of each competitor in 5 mL of M9<sup>+</sup>. For biofilm competitions, we  
531 sonicated one bead per competitor in 1 mL of PBS and mixed in 5 mL of M9<sup>+</sup> containing  
532 3 beads. The mix was cultured at 37°C for 24 hours. We plated at time zero and after 24  
533 hours. For each competition, we plated aliquots onto nonselective tryptic soy agar and  
534 tryptic soy agar containing CIP. Selection rate ( $r$ ) was calculated as the difference of the  
535 Malthusian parameters for the two competitors:  $r = (\ln(\text{CIP resistant}_{d=1}/\text{CIP}$   
536  $\text{resistant}_{d=0}))/(\ln(\text{CIP susceptible}_{d=1}/\text{CIP susceptible}_{d=0}))/\text{day}$  (Lenski, 1991). Susceptible  
537 populations were calculated as the difference between the total populations (number of  
538 colonies/mL growing on the nonselective plates) and the resistant fraction (number of  
539 colonies/mL growing on the plates containing CIP). As a control for calculating the  
540 correct ratio of susceptible vs. resistant populations, we replica plated 50 to 100 colonies  
541 from the nonselective plates onto plates containing CIP as previously described (Santos-  
542 Lopez et al., 2017). Results are the average of three to five independent experiments.

543

#### 544 **Genome sequencing**

545 We sequenced whole populations of three evolving replicates per treatment. We  
546 sequenced the populations at days 1, 3, 4, 6, 7, 9, 10, and 12 of the populations under  
547 increasing concentrations of CIP (populations P1, P2, P3 and B1, B2, B3 for planktonic  
548 and biofilm populations) and at days 1, 4, 9, and 12 of the populations under subinhibitory  
549 concentration and no antibiotic treatments. In addition, we selected 49 clones for  
550 sequencing at the end of the experiment (Figure 2F). 12 of the clones were recovered  
551 from the populations propagated in the absence of the antibiotic, 12 clones from the  
552 subinhibitory concentrations of CIP treatment and 25 were isolated from the increasing  
553 concentrations of antibiotic. We revived each population or clone from a freezer stock in

554 the growth conditions under which they were isolated (*i.e.* the same CIP concentration  
555 which they were exposed to during the experiment) and grew for 24 hours. DNA was  
556 extracted using the Qiagen DNAeasy Blood and Tissue kit (Qiagen, Hiden, Germany).  
557 The sequencing library was prepared as described by Turner and colleagues (Turner et  
558 al., 2018) according to the protocol of Baym *et al.* (Baym et al., 2015), using the Illumina  
559 Nextera kit (Illumina Inc., San Diego, CA) and sequenced using an Illumina NextSeq500  
560 at the Microbial Genome Sequencing center (<http://micropopbio.org/sequencing.html>).

561

## 562 **Data processing**

563 All sequences were first quality filtered and trimmed with the Trimmomatic software  
564 v0.36 (Bolger, Lohse, & Usadel, 2014) using the criteria: LEADING:20 TRAILING:20  
565 SLIDINGWINDOW:4:20 MINLEN:70. Variants were called with the breseq software  
566 v0.31.0 (Deatherage & Barrick, 2014) using the default parameters and the -p flag when  
567 required for identifying polymorphisms in populations. This option calls a mutation if it  
568 is observed in 2 reads from each strand and reaches 5% in the population. The average  
569 depth of sequencing for populations was  $219 \pm 51x$  and average genome coverage was  
570  $98.7 \pm 0.128\%$ . The reference genome used for variant calling was downloaded from the  
571 NCBI RefSeq database using the 17-Mar-2017 version of *A. baumannii* ATCC 17978-  
572 mff complete genome (GCF\_001077675.1). In addition to the chromosome  
573 NZ\_CP012004 and plasmid NZ\_CP012005 sequences, we added two additional plasmid  
574 sequences to the reference genome that are known to be present in our working strain of  
575 *A. baumannii* ATCC 17978-mff: NC009083, NC\_009084. Mutations were then manually  
576 curated and filtered to remove false positives. Mutations were filtered if the gene was  
577 found to contain a mutation when the ancestor sequence was compared to the reference  
578 genome or if a mutation never reached a cumulative frequency of 10% across all replicate



579 populations. Diversity measurements were made in R using the Shannon index  
580 considering the presence, absence, and frequency of alleles. Significant differences  
581 between biofilm and planktonic populations were determined by the Kruskal Wallis test.  
582 Filtering, mutational dynamics, and plotting were done in R v3.4.4 ([www.r-project.org](http://www.r-project.org))  
583 with the packages ggplot2 v2.2.1 (Wickham, 2016), dplyr v0.7.4 (Wickham, François,  
584 Henry, & Müller, 2018), vegan v2.5-1 (Oksanen et al., 2018), and reshape2 (Wickham,  
585 2007).

586

### 587 **Data Availability**

588 R code for filtering and data processing can be found here:  
589 [https://github.com/sirmicrobe/U01\\_allele\\_freq\\_code](https://github.com/sirmicrobe/U01_allele_freq_code). All sequences were deposited into  
590 NCBI under the Biosample accession numbers SAMN09783599-SAMN09783682.

591

### 592 **Authors contribution**

593 VSC, AS-L and CWM conceived and designed the study; AS-L and MRS performed the  
594 experiments; DS sequenced the samples; CWM did the bioinformatic analysis; AS-L,  
595 CWM and VSC wrote the paper.

596

### 597 **Acknowledgments**

598 We thank Caroline B. Turner for helpful discussions and proofreading of the paper,  
599 Allison L. Welp for laboratory assistance and Christopher Deitrick for depositing the  
600 sequences in the NCBI database. This research was supported by NIH U01AI124302-  
601 01.

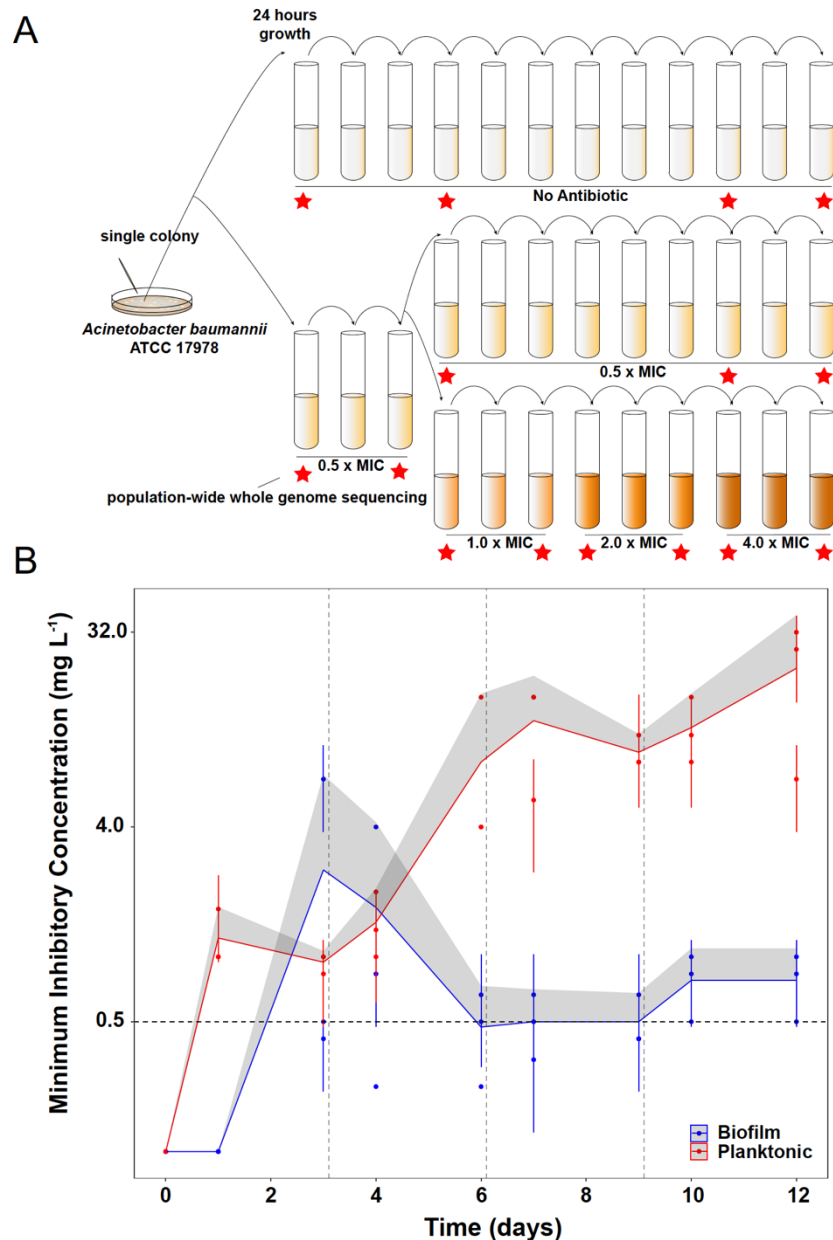

602

603 **Figure 1. Experimental design (A) and dynamics of evolved resistance levels**  
604 **during the evolutionary rescue experiment (B).**

605 A) A single clone of *A. baumannii* ATCC 17978 was propagated both in biofilm and  
606 planktonic conditions for 12 days under no antibiotics (top), subinhibitory concentrations  
607 of CIP (0.0625 mg/L = 0.5x MIC) (middle) or in increasing concentrations of CIP  
608 (bottom). For the latter, termed evolutionary rescue, the concentration of CIP was doubled  
609 from 0.5 x MIC to 4.0 x MIC every 72 hours. As a control, five populations of *A.*

610 *baumannii* ATCC 17978 were propagated in biofilm and five in planktonic conditions in  
611 the absence of antibiotics. We estimated the MICs to CIP and froze the populations for  
612 sequencing before and after doubling the antibiotic concentrations (red stars). B) MICs  
613 (mg/L) of CIP were measured for replicate populations during the evolutionary rescue.  
614 The red and blue points represent the MICs of three populations propagated in planktonic  
615 or biofilm, respectively, with the 95% CI represented by the error bars. The red and blue  
616 lines represent the grand mean of the three planktonic and biofilm populations,  
617 respectively, with the upper 95% CI indicated by the grey shaded area. Horizontal dashed  
618 line indicates the highest CIP exposure during the experiment (4x MIC) and vertical lines  
619 indicate time when CIP concentration was doubled.

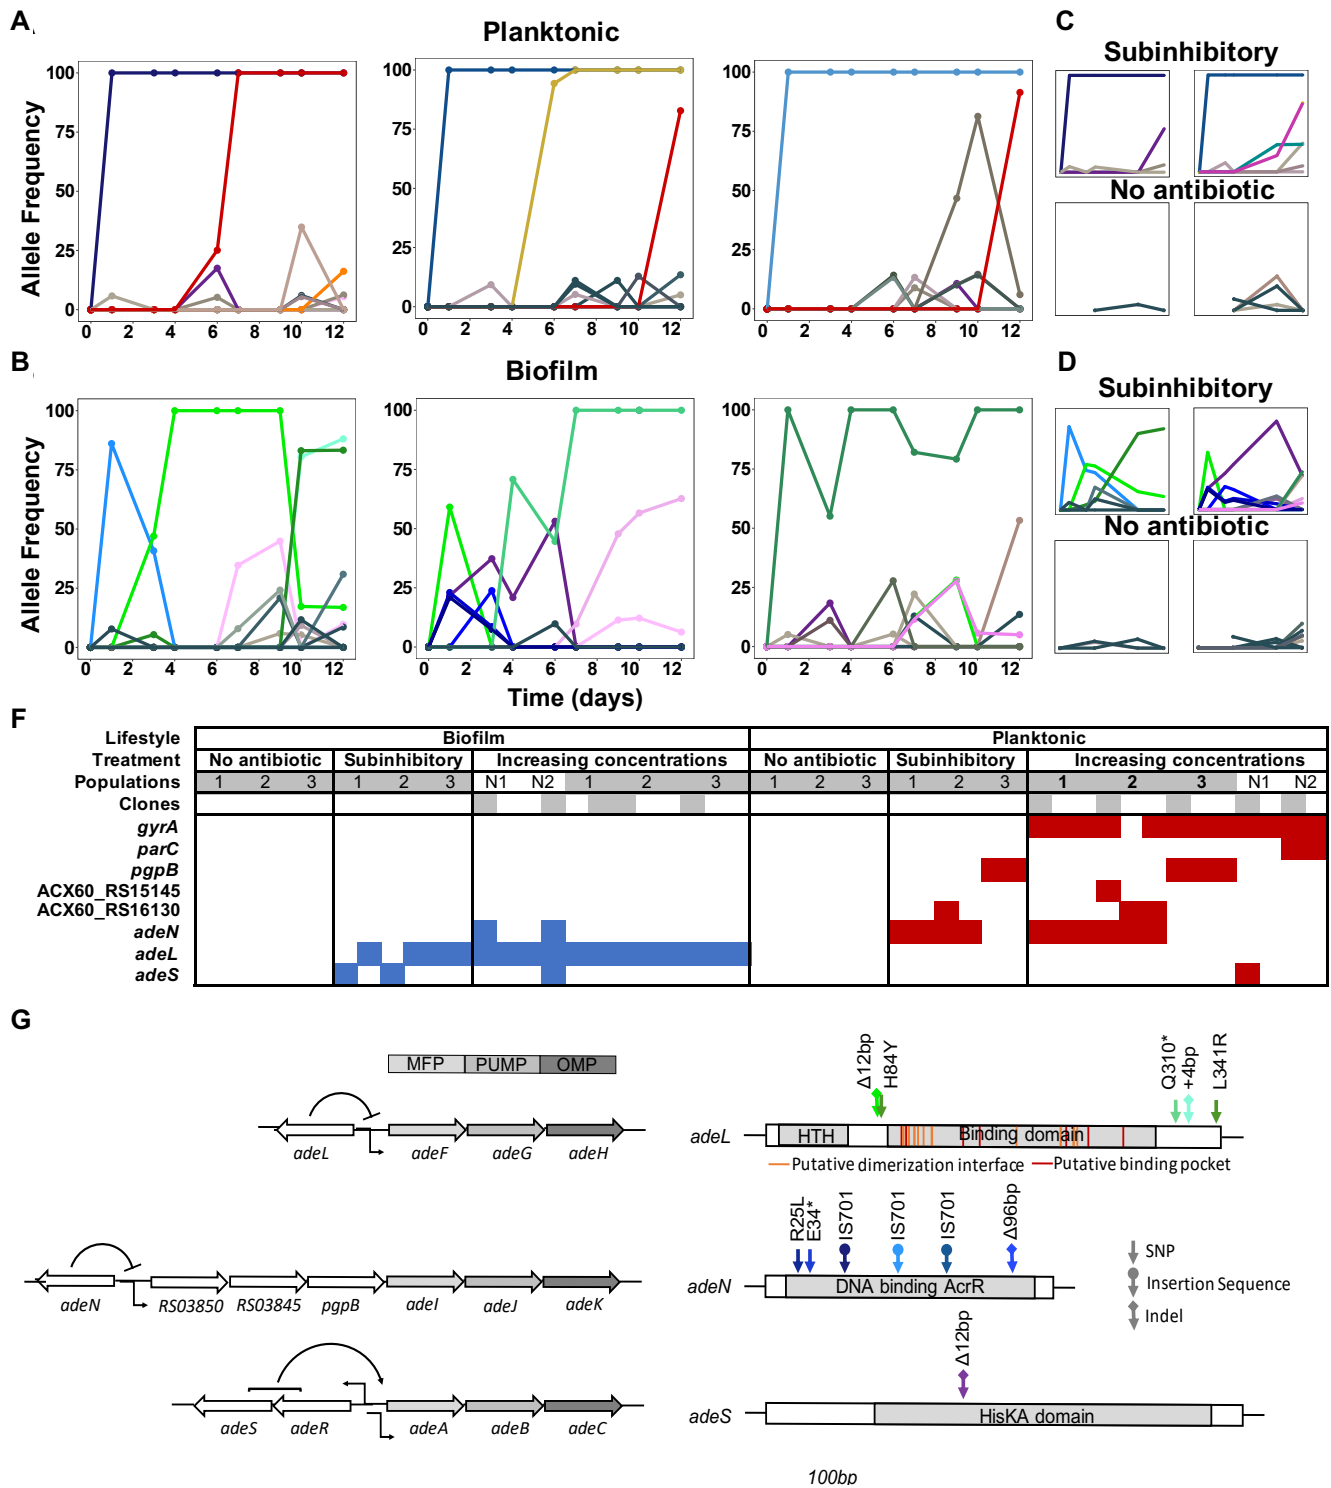

620

621 **Figure 2. Lifestyle-dependent mutations and dynamics under increasing CIP**

622 **selection.**

623 Mutation frequencies in planktonic (A and C) and biofilm populations (B and D) over

624 time as determined by population-wide whole genome sequencing. A) and B) show the

625 mutation frequencies obtained under increasing concentrations of CIP. From left to right:  
626 P1, P2 and P3 in A) and B1, B2 and B3 in B). C) and D) show the mutation frequencies  
627 obtained under the subinhibitory (top) and no antibiotic (bottom) treatments. Mutations  
628 in the same gene share a color. Blue: *adeN* or genes regulated by *adeN*; green: *adeL*; gold:  
629 MFS putative transporter ACX60\_RS15145; purple: *adeS*; pink: *sohB*; red: *gyrA*; and  
630 orange: *parC*. Grey and brown colors indicate genes potentially unrelated to adaptation  
631 to CIP. F) Mutated genes in the sequenced clones. Each column represents one clone.  
632 Grey shading of populations indicates whole population sequencing and N1 and N2  
633 indicate populations where only clones were sequenced. Grey shaded clones were used  
634 for MIC and fitness estimations. Blue and red indicate SNPs in biofilm and planktonic  
635 growing populations respectively. For all SNPs identified in the 49 clones, see Figure S2  
636 and Table S6. G) The genetic organization of the RND efflux pumps is shown on the left.  
637 MFP and OMP denote membrane fusion protein and outer membrane protein  
638 respectively. All mutations found in the RND regulators are shown on the right.

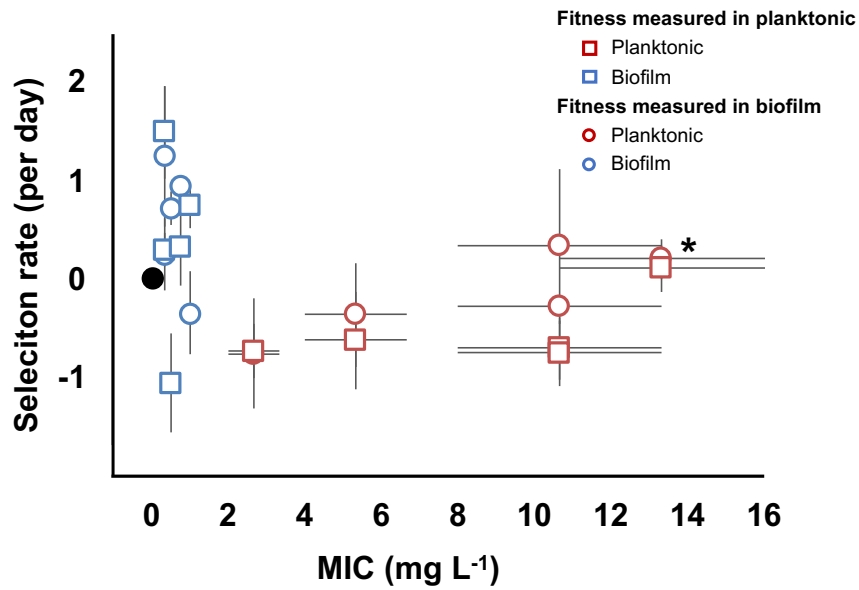

639

640 **Figure 3. Evolved trade-off between resistance level and fitness.**

641 Relative fitness (average  $\pm$  SEM) of 10 evolved clones from the evolutionary rescue  
642 experiment compared to the ancestor and their MICs (mg/L) to CIP. Fitness was measured  
643 in both planktonic (squares) and biofilm (circles) conditions. MICs were estimated in  
644 planktonic conditions. Black dot represents the ancestral clone. \*Denotes the clone with  
645 *gyrA* and *parC* mutations.

646

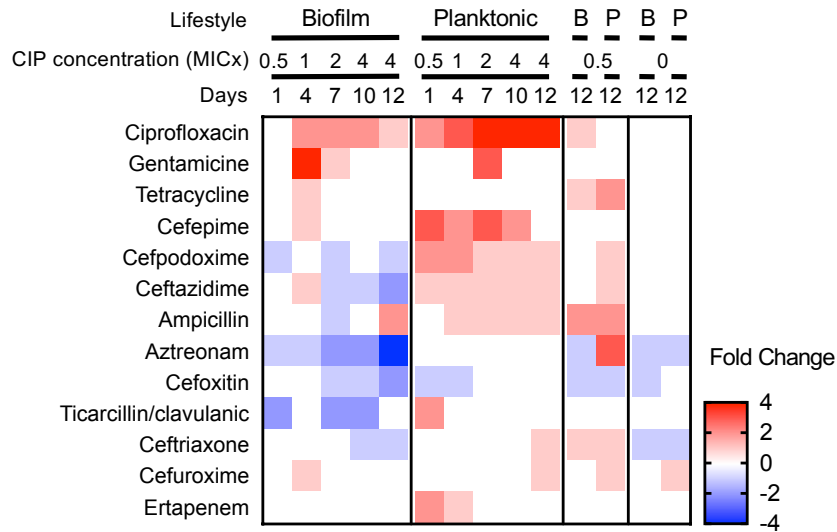

647 **Figure 4. Collateral sensitivities and cross resistances to various antibiotics.**

648 Heat map showing the relative changes in antimicrobial susceptibility to 13 of the 23  
 649 antibiotics tested in the evolved populations (those not shown had no changes). Results  
 650 shown are the median values of the fold change in the evolved populations compared to  
 651 the ancestral strain. For subinhibitory and no-antibiotic treatments, only day 12 is shown.

|                                           | <b>Increasing concentrations</b> |                | <b>Subinhibitory concentrations</b> |                |
|-------------------------------------------|----------------------------------|----------------|-------------------------------------|----------------|
|                                           | <b>Planktonic</b>                | <b>Biofilm</b> | <b>Planktonic</b>                   | <b>Biofilm</b> |
| Total mutations                           | 30                               | 40             | 6                                   | 16             |
| Nonsynonymous/Synonymous <sup>b</sup>     | 8.5                              | 9.67           | 2/0                                 | 6              |
| Intergenic                                | 8                                | 11             | 0                                   | 4              |
| Nonsynonymous                             | 9                                | 13             | 2                                   | 6              |
| Percent intergenic mutations <sup>b</sup> | 0.32                             | 0.29           | 0                                   | 0.25           |

652

653 **Table 1. Mutation spectrum of different selective environments.** Attributes of the  
654 contending mutations during the 12 days of the evolution experiment. <sup>a</sup>Results from the  
655 last day of the experimental evolution. <sup>b</sup>Accounting for all unique mutations detected after  
656 filtering (see methods). For mutation dynamics over time, see Table S3.



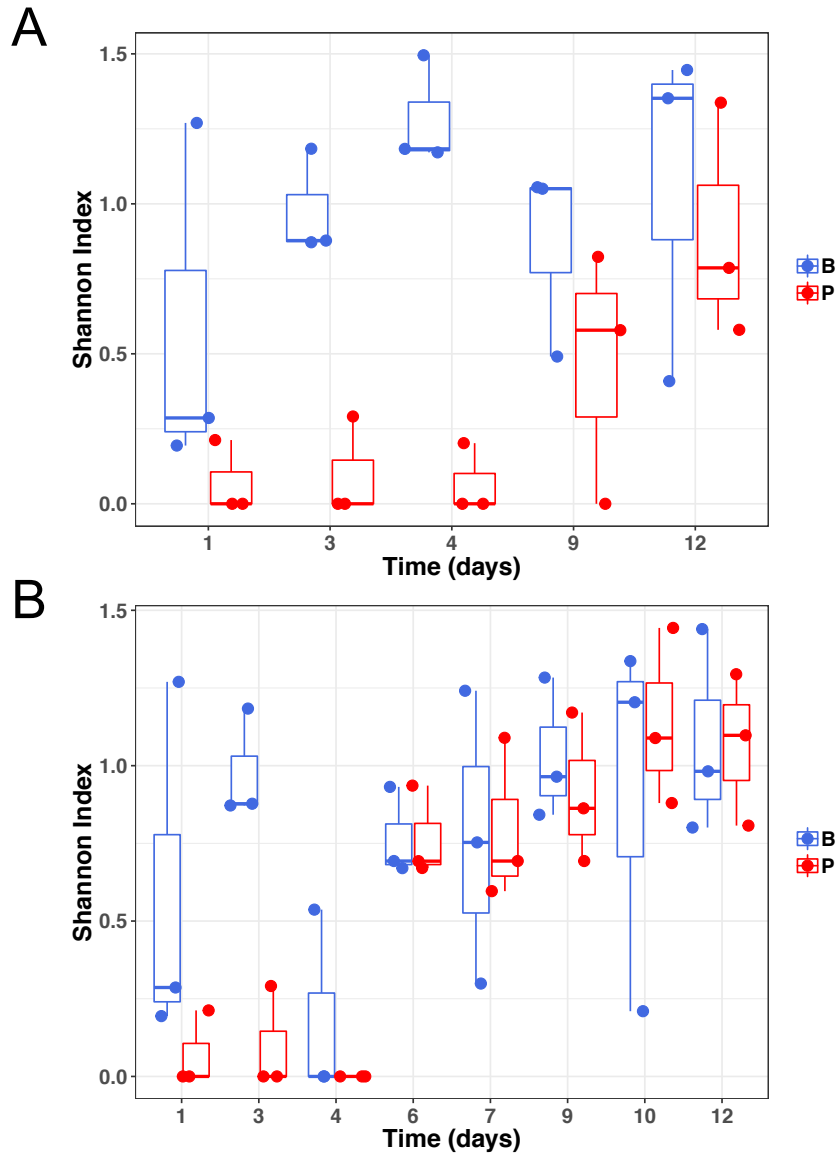

657

658 **Figure S1. Genetic diversity of samples at subinhibitory concentrations of**  
659 **ciprofloxacin (A) or during the evolutionary rescue experiment with increasing**  
660 **concentrations of ciprofloxacin (B). Biofilm populations in blue and planktonic**  
661 **populations in red.**

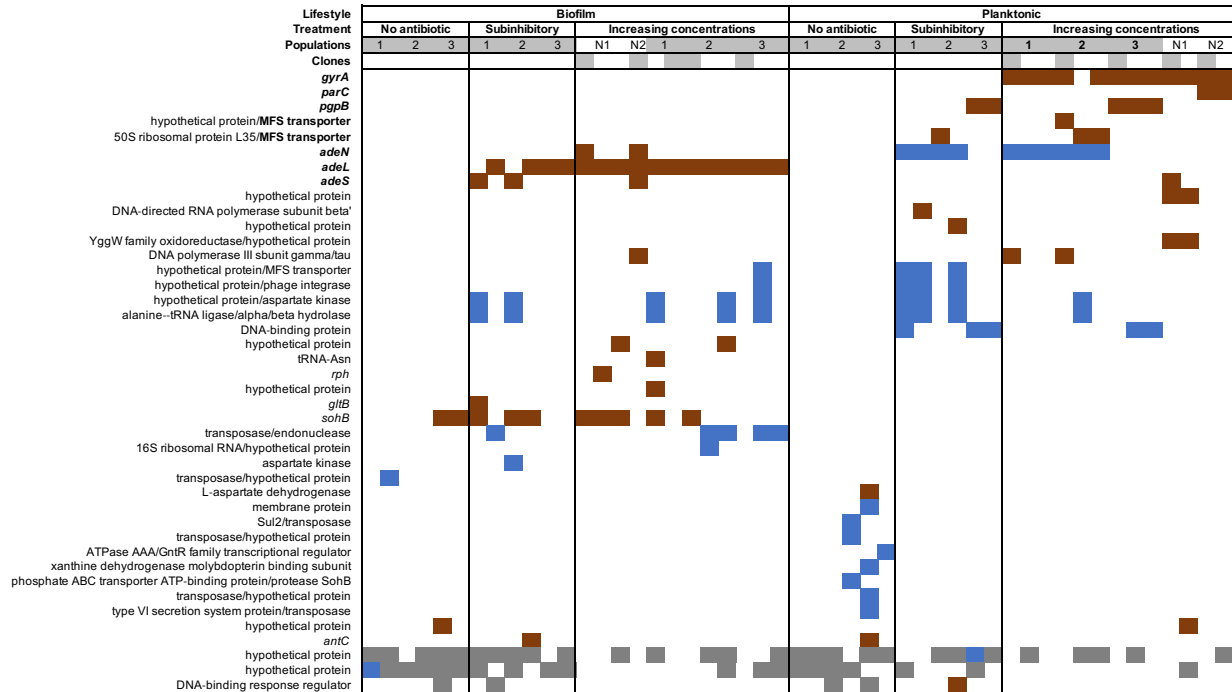

662 **Figure S2. Mutated genes in the sequenced clones differ between treatments.** Each  
 663 column represents one clone. Grey shaded clones were used for MIC and fitness  
 664 estimations. Red color indicates SNPs or small indels, blue color indicates new junction  
 665 evidences and grey indicates missing coverage indicative of a deletion.  
 666

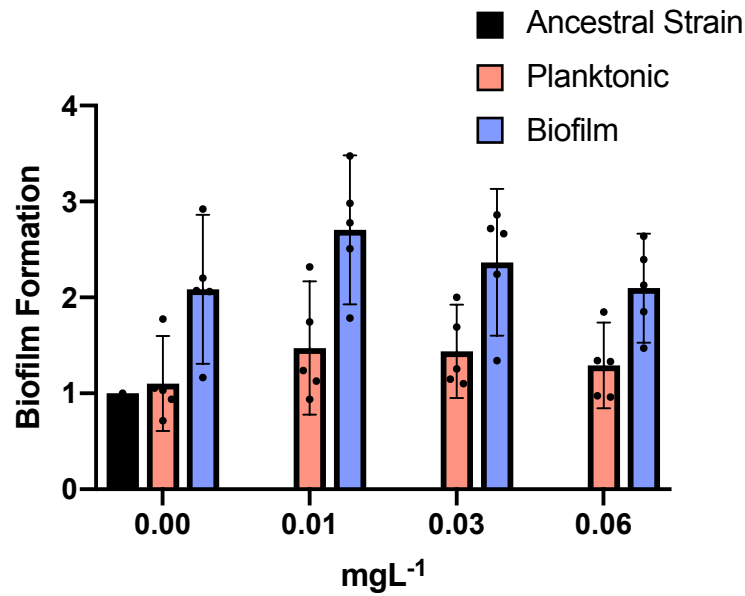

667

668 **Figure S3. Biofilm production under subinhibitory concentrations of CIP.** Blue and  
669 red bars show biofilm and planktonic clones, respectively. The ancestral strain is  
670 represented by the black bar. Individual clone results are shown as points. The averages  
671 are shown by bars. 95% CI are indicated by the error bars. Biofilm clones produced more  
672 biofilm than planktonic clones: two tailed t-test of biofilm formation with 0.00 mg/L of  
673 CIP:  $p = 0.006$ ,  $t = 3.008$ ,  $df = 32$ ; with 0.01 mg/L of CIP:  $p = 0.0006$ ,  $t = 3.780$ ,  $df = 32$ ;  
674 with 0.03 mg/L of CIP:  $p = 0.0077$ ,  $t = 2.841$ ,  $df = 32$  and with 0.0625 mg/L of CIP:  $p =$   
675  $0.018$ ,  $t = 2.471$ ,  $df = 32$ .

676

| Treatment and Populations  |    | MIC (mg/L)   | Fold MIC increase |
|----------------------------|----|--------------|-------------------|
| <b>No Antibiotic</b>       |    |              |                   |
| Planktonic                 |    |              |                   |
|                            | P1 | 0.25 ± 0.00  | 2                 |
|                            | P2 | 0.25 ± 0     | 2                 |
|                            | P3 | 0.21 ± 0.03  | 1.68              |
| Biofilm                    |    |              |                   |
|                            | B1 | 0.25 ± 0     | 2                 |
|                            | B2 | 0.25 ± 0     | 2                 |
|                            | B3 | 0.25 ± 0     | 2                 |
| <b>Subinhibitory</b>       |    |              |                   |
| Planktonic                 |    |              |                   |
|                            | P1 | 2.33 ± 0.72  | 18.64             |
|                            | P2 | 4 ± 0        | 32                |
|                            | P3 | 1 ± 0        | 8                 |
| Biofilm                    |    |              |                   |
|                            | B1 | 0.41 ± 0.07  | 3.28              |
|                            | B2 | 0.5 ± 0      | 4                 |
|                            | B3 | 0.5 ± 0      | 4                 |
| <b>Evolutionary rescue</b> |    |              |                   |
| Planktonic                 |    |              |                   |
|                            | P1 | 26.67 ± 5.34 | 213.36            |
|                            | P2 | 32 ± 0       | 256               |
|                            | P3 | 6.67 ± 1.34  | 53.36             |
| Biofilm                    |    |              |                   |
|                            | B1 | 1 ± 0        | 8                 |
|                            | B2 | 0.5 ± 0      | 4                 |
|                            | B3 | 0.83 ± 0.17  | 6.64              |

677

678 **Table S1. Antibiotic susceptibility of the populations propagated in the absence, in**  
679 **subinhibitory concentrations or increasing concentrations of CIP at the end of the**  
680 **experiment (day 12). MICs are expressed in mg/L and standard errors of the mean are**  
681 **indicated. Fold increase in MIC compared to the ancestral strain are also indicated.**

| <b>Treatment and Populations</b> | <b>MIC measured in biofilms (mg/L)</b> | <b>Fold MIC increase</b> |
|----------------------------------|----------------------------------------|--------------------------|
| <b>Evolutionary rescue</b>       |                                        |                          |
| Planktonic                       |                                        |                          |
| P1                               | > 128 ± 0                              | >1024                    |
| P2                               | > 128 ± 0                              | >1024                    |
| P3                               | > 128 ± 0                              | >1024                    |
| Biofilm                          |                                        |                          |
| B1                               | 32 ± 0                                 | 256                      |
| B2                               | 32 ± 0                                 | 256                      |
| B3                               | 32 ± 0                                 | 256                      |

682

683 **Table S2. Antibiotic susceptibility of one clone of each population propagated in**  
684 **increasing concentrations of CIP at the end of the experiment (day 12).** MICs were  
685 measured in biofilms and are expressed in mg/L and standard errors of the mean are  
686 indicated. Fold increase in MIC compared to the ancestral strain are also indicated.

687 **Table S3. Mutation probabilities (attached XLS file)**

688

|                   |      | Increasing concentrations |                      |                     |                 | Subinhibitory concentrations |                      |                     |                 |
|-------------------|------|---------------------------|----------------------|---------------------|-----------------|------------------------------|----------------------|---------------------|-----------------|
|                   | Days | Nonsynonymous/Synonymous  | Intergenic mutations | Structural variants | Total mutations | Nonsynonymous/Synonymous     | Intergenic mutations | Structural variants | Total mutations |
| <b>Biofilm</b>    | 1    | 4/0                       | 0                    | 4                   | 8               | 4/0                          | 0                    | 4                   | 8               |
|                   | 3    | 5/0                       | 0                    | 8                   | 13              | 5/0                          | 0                    | 8                   | 13              |
|                   | 4    | 2/0                       | 0                    | 2                   | 4               | 6/1                          | 2                    | 8                   | 17              |
|                   | 6    | 3/1                       | 0                    | 4                   | 8               | -                            | -                    | -                   | -               |
|                   | 7    | 6/0                       | 3                    | 4                   | 13              | -                            | -                    | -                   | -               |
|                   | 9    | 5/0                       | 2                    | 6                   | 13              | 4/0                          | 1                    | 6                   | 11              |
|                   | 10   | 7/0                       | 2                    | 5                   | 12              | -                            | -                    | -                   | -               |
|                   | 12   | 7/0                       | 1                    | 6                   | 14              | 5/0                          | 1                    | 7                   | 12              |
| <b>Planktonic</b> | 1    | 1/0                       | 0                    | 3                   | 4               | 1/0                          | 0                    | 3                   | 4               |
|                   | 3    | 2/0                       | 0                    | 2                   | 4               | 2/0                          | 0                    | 2                   | 4               |
|                   | 4    | 1/0                       | 0                    | 2                   | 3               | 1/0                          | 0                    | 3                   | 4               |
|                   | 6    | 5/0                       | 2                    | 7                   | 14              | -                            | -                    | -                   | -               |
|                   | 7    | 6/0                       | 3                    | 4                   | 13              | -                            | -                    | -                   | -               |
|                   | 9    | 3/1                       | 3                    | 6                   | 10              | 2/0                          | 1                    | 4                   | 7               |
|                   | 10   | 5/2                       | 5                    | 6                   | 14              | -                            | -                    | -                   | -               |
|                   | 12   | 7/1                       | 1                    | 5                   | 13              | 2/0                          | 2                    | 7                   | 11              |

689 **Table S4. Attributes of the contending mutations each day in the experimental**  
 690 **evolution.**

| <b>Locus Tag</b> | <b>Mutation</b>                      | <b>Annotation</b>       | <b>Description</b>                                   |
|------------------|--------------------------------------|-------------------------|------------------------------------------------------|
| ACX60_RS01385    | A→G                                  | E292G (GAG→GGG)         | energy-dependent translational throttle protein EttA |
| ACX60_RS04575    | C→T                                  | R226H (CGT→CAT)         | fructose 1,6-bisphosphatase                          |
| ACX60_RS18160    | (ATGGTG) <sub>9</sub> → <sub>8</sub> | coding (454-459/987 nt) | cation transporter                                   |

691

692 **Table S5. Mutated genes in the ancestral strain compared to the *A. baumannii***

693 **ATCC 17978-mff complete genome (GCF\_001077675.1) after 10 days of evolution**

694 **in M9<sup>+</sup>.**

695



696 **Table S6. Complete list of mutated genes from the sequenced clones (attached XLS**  
697 **file)**

| <b>Transporter Family</b> | <b>Regulator</b> | <b>Efflux pump</b> | <b>Substrates<sup>a</sup></b>                                                |
|---------------------------|------------------|--------------------|------------------------------------------------------------------------------|
| RND                       | AdeSR            | AdeABC             | AG, <b>BL</b> , CHL, ERY, <b>FQ</b> , NAL, TET, TGC                          |
| RND                       | AdeL             | AdeFGH             | CHL, ERY, <b>FQ</b> , NAL, SUL, TET, TGC, TMP                                |
| RND                       | AdeN             | AdeIJK             | AZI, <b>BL</b> , CHL, ERY, <b>FQ</b> , FUA, MIN, NAL, RIF, SA, SUL, TET, TMP |
| MATE                      | -                | AbeM               | <b>FQ</b> , GEN                                                              |

698

699 **Table S7. Efflux pumps and their regulators in *A. baumannii* 17978 targeted under**

700 **CIP pressure.** Table adapted from (Li, Elkins et al. 2016). AG aminoglycosides, AZI

701 azithromycin, BL  $\beta$ -lactams, CHL chloramphenicol, CIP CIP, CL clindamycin, ERY

702 erythromycin, FLO florfenicol, FUA fusidic acid, GEN gentamicin, MIN minocycline,

703 NAL nalidixic acid, NOR norfloxacin, RIF rifampicin, SUL sulfonamides, TET

704 tetracycline, TGC tigecycline, TMP trimethoprim. <sup>a</sup> References in (X.-Z. Li et al., 2016).

705 **References**

- 706 Adams-Haduch, J. M., Paterson, D. L., Sidjabat, H. E., Pasculle, A. W., Potoski, B. A., Muto,  
707 C. A., . . . Doi, Y. (2008). Genetic basis of multidrug resistance in *Acinetobacter*  
708 *baumannii* clinical isolates at a tertiary medical center in Pennsylvania. *Antimicrob*  
709 *Agents Chemother*, *52*(11), 3837-3843. doi:10.1128/aac.00570-08
- 710 Ahmed, M. N., Porse, A., Sommer, M. O. A., Hoiby, N., & Ciofu, O. (2018). Evolution of  
711 antibiotic resistance in biofilm and planktonic *P. aeruginosa* populations exposed to  
712 sub-inhibitory levels of ciprofloxacin. *Antimicrob Agents Chemother*.  
713 doi:10.1128/aac.00320-18
- 714 Aka, S. T., & Haji, S. H. (2015). Sub-MIC of antibiotics induced biofilm formation of  
715 *Pseudomonas aeruginosa* in the presence of chlorhexidine. *Braz J Microbiol*, *46*(1),  
716 149-154. doi:10.1590/S1517-838246120140218
- 717 Alav, I., Sutton, J. M., & Rahman, K. M. (2018). Role of bacterial efflux pumps in biofilm  
718 formation. *J Antimicrob Chemother*, *73*(8), 2003-2020. doi:10.1093/jac/dky042
- 719 Andersson, D. I., & Hughes, D. (2014). Microbiological effects of sublethal levels of  
720 antibiotics. *Nat Rev Microbiol*, *12*(7), 465-478. doi:10.1038/nrmicro3270
- 721 Ardebili, A., Lari, A. R., & Talebi, M. (2014). Correlation of ciprofloxacin resistance with the  
722 AdeABC efflux system in *Acinetobacter baumannii* clinical isolates. *Ann Lab Med*,  
723 *34*(6), 433-438. doi:10.3343/alm.2014.34.6.433
- 724 Asif, M., Alvi, I. A., & Rehman, S. U. (2018). Insight into *Acinetobacter baumannii*:  
725 pathogenesis, global resistance, mechanisms of resistance, treatment options, and  
726 alternative modalities. *Infect Drug Resist*, *11*, 1249-1260. doi:10.2147/idr.S166750
- 727 Azimi, L., & Rastegar Lari, A. (2017). Collateral sensitivity between aminoglycosides and beta-  
728 lactam antibiotics depends on active proton pumps. *Microb Pathog*, *112*, 122-125.  
729 doi:10.1016/j.micpath.2017.09.049
- 730 Baquero, F., Negri, M. C., Morosini, M. I., & Blazquez, J. (1998). Antibiotic-selective  
731 environments. *Clin Infect Dis*, *27 Suppl 1*, S5-11.
- 732 Barbosa, C., Trebosc, V., Kemmer, C., Rosenstiel, P., Beardmore, R., Schulenburg, H., &  
733 Jansen, G. (2017). Alternative Evolutionary Paths to Bacterial Antibiotic Resistance  
734 Cause Distinct Collateral Effects. *Mol Biol Evol*, *34*(9), 2229-2244.  
735 doi:10.1093/molbev/msx158
- 736 Barrick, J. E., & Lenski, R. E. (2013). Genome dynamics during experimental evolution. *Nature*  
737 *reviews. Genetics*, *14*, 827-839. doi:10.1038/nrg3564
- 738 Barrick, J. E., Yu, D. S., Yoon, S. H., Jeong, H., Oh, T. K., Schneider, D., . . . Kim, J. F. (2009).  
739 Genome evolution and adaptation in a long-term experiment with *Escherichia coli*.  
740 *Nature*, *461*, 1243-1247. doi:10.1038/nature08480
- 741 Basra, P., Alsaadi, A., Bernal-Astrain, G., O'Sullivan, M. L., Hazlett, B., Clarke, L. M., . . .  
742 Wong, A. (2018). Fitness tradeoffs of antibiotic resistance in extra-intestinal pathogenic  
743 *Escherichia coli*. *Genome Biol Evol*. doi:10.1093/gbe/evy030
- 744 Baumann, P., Doudoroff, M., & Stanier, R. Y. (1968). A study of the *Moraxella* group. II.  
745 Oxidative-negative species (genus *Acinetobacter*). *J Bacteriol*, *95*(5), 1520-1541.
- 746 Baym, M., Kryazhimskiy, S., Lieberman, T. D., Chung, H., Desai, M. M., & Kishony, R.  
747 (2015). Inexpensive multiplexed library preparation for megabase-sized genomes. *PLoS*  
748 *One*, *10*(5), e0128036. doi:10.1371/journal.pone.0128036
- 749 Baym, M., Lieberman, T. D., Kelsic, E. D., Chait, R., Gross, R., Yelin, I., & Kishony, R.  
750 (2016). Spatiotemporal microbial evolution on antibiotic landscapes. *Science*,  
751 *353*(6304), 1147-1151. doi:10.1126/science.aag0822
- 752 Baym, M., Stone, L. K., & Kishony, R. (2016). Multidrug evolutionary strategies to reverse  
753 antibiotic resistance. *Science*, *351*(6268), aad3292. doi:10.1126/science.aad3292
- 754 Bell, G., & Gonzalez, A. (2009). Evolutionary rescue can prevent extinction following  
755 environmental change. *Ecol Lett*, *12*(9), 942-948. doi:10.1111/j.1461-  
756 0248.2009.01350.x
- 757 Bolger, A. M., Lohse, M., & Usadel, B. (2014). Trimmomatic: a flexible trimmer for Illumina  
758 sequence data. *Bioinformatics*, *30*(15), 2114-2120. doi:10.1093/bioinformatics/btu170

- 759 Bolnick, D. I., Barrett, R. D. H., Oke, K. B., Rennison, D. J., & Stuart, Y. E. (2018).  
760 (Non)Parallel Evolution. *Annual Review of Ecology, Evolution, and Systematics*, 49(1),  
761 303-330. doi:10.1146/annurev-ecolsys-110617-062240
- 762 Borriello, G., Werner, E., Roe, F., Kim, A. M., Ehrlich, G. D., & Stewart, P. S. (2004). Oxygen  
763 limitation contributes to antibiotic tolerance of *Pseudomonas aeruginosa* in biofilms.  
764 *Antimicrob Agents Chemother*, 48(7), 2659-2664. doi:10.1128/aac.48.7.2659-  
765 2664.2004
- 766 Brockhurst, M. A., Harrison, F., Veening, J. W., Harrison, E., Blackwell, G., Iqbal, Z., &  
767 Maclean, C. (2019). Assessing evolutionary risks of resistance for new antimicrobial  
768 therapies. *Nat Ecol Evol*, 3(4), 515-517. doi:10.1038/s41559-019-0854-x
- 769 CLSI. (2017). CLSI. Clinical and Laboratory Standards Institute. Performance Standards for  
770 Antimicrobial Susceptibility Testing-Seventeenth edition: Approved Standar M100-  
771 S17. Wayne, PA, USA: CLSI.
- 772 Cooper, V. S. (2018). Experimental Evolution as a High-Throughput Screen for Genetic  
773 Adaptations. *mSphere*, 3(3). doi:10.1128/mSphere.00121-18
- 774 Cooper, V. S., Staples, R. K., Traverse, C. C., & Ellis, C. N. (2014). Parallel evolution of small  
775 colony variants in *Burkholderia cenocepacia* biofilms. *Genomics*, 104(6 Pt A), 447-452.  
776 doi:10.1016/j.ygeno.2014.09.007
- 777 Coyne, S., Courvalin, P., & Perichon, B. (2011). Efflux-mediated antibiotic resistance in  
778 *Acinetobacter* spp. *Antimicrob Agents Chemother*, 55(3), 947-953.  
779 doi:10.1128/aac.01388-10
- 780 Coyne, S., Rosenfeld, N., Lambert, T., Courvalin, P., & Perichon, B. (2010). Overexpression of  
781 resistance-nodulation-cell division pump AdeFGH confers multidrug resistance in  
782 *Acinetobacter baumannii*. *Antimicrob Agents Chemother*, 54(10), 4389-4393.  
783 doi:10.1128/AAC.00155-10
- 784 Dahdouh, E., Gomez-Gil, R., Pacho, S., Mingorance, J., Daoud, Z., & Suarez, M. (2017).  
785 Clonality, virulence determinants, and profiles of resistance of clinical *Acinetobacter*  
786 *baumannii* isolates obtained from a Spanish hospital. *PLoS One*, 12(4), e0176824.  
787 doi:10.1371/journal.pone.0176824
- 788 Damier-Piolle, L., Magnet, S., Bremont, S., Lambert, T., & Courvalin, P. (2008). AdeIJK, a  
789 resistance-nodulation-cell division pump effluxing multiple antibiotics in *Acinetobacter*  
790 *baumannii*. *Antimicrob Agents Chemother*, 52(2), 557-562. doi:10.1128/AAC.00732-07
- 791 de Visser, J. A., & Rozen, D. E. (2006). Clonal interference and the periodic selection of new  
792 beneficial mutations in *Escherichia coli*. *Genetics*, 172(4), 2093-2100.  
793 doi:10.1534/genetics.105.052373
- 794 Deatherage, D. E., & Barrick, J. E. (2014). Identification of mutations in laboratory-evolved  
795 microbes from next-generation sequencing data using breseq. *Methods Mol Biol*, 1151,  
796 165-188. doi:10.1007/978-1-4939-0554-6\_12
- 797 Dhawan, A., Nichol, D., Kinose, F., Abazeed, M. E., Marusyk, A., Haura, E. B., & Scott, J. G.  
798 (2017). Collateral sensitivity networks reveal evolutionary instability and novel  
799 treatment strategies in ALK mutated non-small cell lung cancer. *Sci Rep*, 7(1), 1232.  
800 doi:10.1038/s41598-017-00791-8
- 801 Diez-Aguilar, M., Morosini, M. I., Köksal, E., Oliver, A., Ekkelenkamp, M., & Cantón, R.  
802 (2018). Use of Calgary and Microfluidic BioFlux Systems To Test the Activity of  
803 Fosfomycin and Tobramycin Alone and in Combination against Cystic Fibrosis  
804 *Pseudomonas aeruginosa* Biofilms. *Antimicrobial agents and chemotherapy*, 62(1),  
805 e01650-01617. doi:10.1128/aac.01650-17
- 806 Dillon, M. M., Sung, W., Sebra, R., Lynch, M., & Cooper, V. S. (2017). Genome-Wide Biases  
807 in the Rate and Molecular Spectrum of Spontaneous Mutations in *Vibrio cholerae* and  
808 *Vibrio fischeri*. *Mol Biol Evol*, 34(1), 93-109. doi:10.1093/molbev/msw224
- 809 Doi, Y., Murray, G. L., & Peleg, A. Y. (2015). *Acinetobacter baumannii*: evolution of  
810 antimicrobial resistance-treatment options. *Semin Respir Crit Care Med*, 36(1), 85-98.  
811 doi:10.1055/s-0034-1398388
- 812 Elena, S. F., & Lenski, R. E. (2003). Evolution experiments with microorganisms: the dynamics  
813 and genetic bases of adaptation. *Nature Reviews Genetics*, 4, 457. doi:10.1038/nrg1088

- 814 Ellis, C. N., Traverse, C. C., Mayo-Smith, L., Buskirk, S. W., & Cooper, V. S. (2015).  
815 Character displacement and the evolution of niche complementarity in a model biofilm  
816 community. *Evolution*, *69*(2), 283-293. doi:10.1111/evo.12581
- 817 Eze, E. C., Chenia, H. Y., & El Zowalaty, M. E. (2018). Acinetobacter baumannii biofilms:  
818 effects of physicochemical factors, virulence, antibiotic resistance determinants, gene  
819 regulation, and future antimicrobial treatments. *Infect Drug Resist*, *11*, 2277-2299.  
820 doi:10.2147/idr.S169894
- 821 Fernando, D., Zhanel, G., & Kumar, A. (2013). Antibiotic resistance and expression of  
822 resistance-nodulation-division pump- and outer membrane porin-encoding genes in  
823 Acinetobacter species isolated from Canadian hospitals. *Can J Infect Dis Med*  
824 *Microbiol*, *24*(1), 17-21.
- 825 France, M. T., Cornea, A., Kehlet-Delgado, H., & Forney, L. J. (2019). Spatial structure  
826 facilitates the accumulation and persistence of antibiotic-resistant mutants in biofilms.  
827 *Evolutionary Applications*, *12*(3), 498-507. doi:doi:10.1111/eva.12728
- 828 Fux, C. A., Costerton, J. W., Stewart, P. S., & Stoodley, P. (2005). Survival strategies of  
829 infectious biofilms. *Trends Microbiol*, *13*(1), 34-40. doi:10.1016/j.tim.2004.11.010
- 830 Geisinger, E., & Isberg, R. R. (2015). Antibiotic modulation of capsular exopolysaccharide and  
831 virulence in Acinetobacter baumannii. *PLoS Pathog*, *11*(2), e1004691.  
832 doi:10.1371/journal.ppat.1004691
- 833 Geisinger, E., Vargas-Cuevas, G., Mortman, N. J., Syal, S., Wainwright, E., Lazinski, D. W., . . .  
834 . Isberg, R. R. (2018). The landscape of intrinsic and evolved fluoroquinolone resistance  
835 in Acinetobacter baumannii includes suppression of drug-induced prophage replication.  
836 *bioRxiv*, 442681. doi:10.1101/442681
- 837 Habets, M. G., Rozen, D. E., Hoekstra, R. F., & de Visser, J. A. (2006). The effect of population  
838 structure on the adaptive radiation of microbial populations evolving in spatially  
839 structured environments. *Ecol Lett*, *9*(9), 1041-1048. doi:10.1111/j.1461-  
840 0248.2006.00955.x
- 841 Hamed, K., & Debonnett, L. (2017). Tobramycin inhalation powder for the treatment of  
842 pulmonary Pseudomonas aeruginosa infection in patients with cystic fibrosis: a review  
843 based on clinical evidence. *Ther Adv Respir Dis*, *11*(5), 193-209.  
844 doi:10.1177/1753465817691239
- 845 He, X., Lu, F., Yuan, F., Jiang, D., Zhao, P., Zhu, J., . . . Lu, G. (2015). Biofilm Formation  
846 Caused by Clinical Acinetobacter baumannii Isolates Is Associated with  
847 Overexpression of the AdeFGH Efflux Pump. *Antimicrob Agents Chemother*, *59*(8),  
848 4817-4825. doi:10.1128/AAC.00877-15
- 849 Hill, D., Rose, B., Pajkos, A., Robinson, M., Bye, P., Bell, S., . . . Harbour, C. (2005).  
850 Antibiotic Susceptibilities of Pseudomonas aeruginosa Isolates Derived  
851 from Patients with Cystic Fibrosis under Aerobic, Anaerobic, and Biofilm Conditions.  
852 *Journal of Clinical Microbiology*, *43*(10), 5085-5090. doi:10.1128/jcm.43.10.5085-  
853 5090.2005
- 854 Hoffman, L. R., D'Argenio, D. A., MacCoss, M. J., Zhang, Z., Jones, R. A., & Miller, S. I.  
855 (2005). Aminoglycoside antibiotics induce bacterial biofilm formation. *Nature*,  
856 *436*(7054), 1171-1175. doi:10.1038/nature03912
- 857 Hoiby, N., Bjarnsholt, T., Givskov, M., Molin, S., & Ciofu, O. (2010). Antibiotic resistance of  
858 bacterial biofilms. *Int J Antimicrob Agents*, *35*(4), 322-332.  
859 doi:10.1016/j.ijantimicag.2009.12.011
- 860 Hua, X., Chen, Q., Li, X., & Yu, Y. (2014). Global transcriptional response of Acinetobacter  
861 baumannii to a subinhibitory concentration of tigecycline. *Int J Antimicrob Agents*,  
862 *44*(4), 337-344. doi:10.1016/j.ijantimicag.2014.06.015
- 863 Hughes, D., & Andersson, D. I. (2017). Evolutionary Trajectories to Antibiotic Resistance.  
864 *Annu Rev Microbiol*. doi:10.1146/annurev-micro-090816-093813
- 865 Huseby, D. L., Pietsch, F., Brandis, G., Garoff, L., Tegehall, A., & Hughes, D. (2017). Mutation  
866 Supply and Relative Fitness Shape the Genotypes of Ciprofloxacin-Resistant  
867 Escherichia coli. *Mol Biol Evol*, *34*(5), 1029-1039. doi:10.1093/molbev/msx052



- 868 Imamovic, L., & Sommer, M. O. (2013). Use of collateral sensitivity networks to design drug  
869 cycling protocols that avoid resistance development. *Sci Transl Med*, 5(204), 204ra132.  
870 doi:10.1126/scitranslmed.3006609
- 871 Kassen, R. (2009). Toward a general theory of adaptive radiation: insights from microbial  
872 experimental evolution. *Ann N Y Acad Sci*, 1168, 3-22. doi:10.1111/j.1749-  
873 6632.2009.04574.x
- 874 Khan, G. A., Berglund, B., Khan, K. M., Lindgren, P. E., & Fick, J. (2013). Occurrence and  
875 abundance of antibiotics and resistance genes in rivers, canal and near drug formulation  
876 facilities--a study in Pakistan. *PLoS One*, 8(6), e62712.  
877 doi:10.1371/journal.pone.0062712
- 878 Kim, S., Lieberman, T. D., & Kishony, R. (2014). Alternating antibiotic treatments constrain  
879 evolutionary paths to multidrug resistance. *Proc Natl Acad Sci U S A*, 111(40), 14494-  
880 14499. doi:10.1073/pnas.1409800111
- 881 Kirby, A. E., Garner, K., & Levin, B. R. (2012). The relative contributions of physical structure  
882 and cell density to the antibiotic susceptibility of bacteria in biofilms. *Antimicrob  
883 Agents Chemother*, 56(6), 2967-2975. doi:10.1128/AAC.06480-11
- 884 Kröger, C., MacKenzie, K. D., Alshabib, E. Y., Kirzinger, M. W. B., Suchan, D. M., Chao, T.  
885 C., . . . Cameron, A. D. S. (2018). The primary transcriptome, small RNAs and  
886 regulation of antimicrobial resistance in *Acinetobacter baumannii* ATCC 17978.  
887 *Nucleic Acids Res*, 46(18), 9684-9698. doi:10.1093/nar/gky603
- 888 Kugelberg, E., Lofmark, S., Wretling, B., & Andersson, D. I. (2005). Reduction of the fitness  
889 burden of quinolone resistance in *Pseudomonas aeruginosa*. *J Antimicrob Chemother*,  
890 55(1), 22-30. doi:10.1093/jac/dkh505
- 891 Lenski, R. E. (1991). Quantifying fitness and gene stability in microorganisms. *Biotechnology*,  
892 15, 173-192.
- 893 Leus, I. V., Weeks, J. W., Bonifay, V., Smith, L., Richardson, S., & Zgurskaya, H. I. (2018).  
894 Substrate specificities and efflux efficiencies of RND efflux pumps of *Acinetobacter  
895 baumannii*. *J Bacteriol*. doi:10.1128/JB.00049-18
- 896 Li, X.-Z., Elkins, C. A., & Zgurskaya, H. I. (2016). *Efflux-Mediated Antimicrobial Resistance in  
897 Bacteria: Mechanisms, Regulation and Clinical Implications*: Springer.
- 898 Linares, J. F., Gustafsson, I., Baquero, F., & Martinez, J. L. (2006). Antibiotics as  
899 intermicrobial signaling agents instead of weapons. *Proc Natl Acad Sci U S A*, 103(51),  
900 19484-19489. doi:10.1073/pnas.0608949103
- 901 Lopes, B. S., & Amyes, S. G. (2013). Insertion sequence disruption of *adeR* and ciprofloxacin  
902 resistance caused by efflux pumps and *gyrA* and *parC* mutations in *Acinetobacter  
903 baumannii*. *Int J Antimicrob Agents*, 41(2), 117-121.  
904 doi:10.1016/j.ijantimicag.2012.08.012
- 905 Lynch, M., Ackerman, M. S., Gout, J.-F., Long, H., Sung, W., Thomas, W. K., & Foster, P. L.  
906 (2016). Genetic drift, selection and the evolution of the mutation rate. *Nature Reviews  
907 Genetics*, 17, 704. doi:10.1038/nrg.2016.104
- 908 Maclean, R. C., Hall, A. R., Perron, G. G., & Buckling, A. (2010). The evolution of antibiotic  
909 resistance: insight into the roles of molecular mechanisms of resistance and treatment  
910 context. *Discov Med*, 10(51), 112-118.
- 911 Marcusson, L. L., Frimodt-Moller, N., & Hughes, D. (2009). Interplay in the selection of  
912 fluoroquinolone resistance and bacterial fitness. *PLoS Pathog*, 5(8), e1000541.  
913 doi:10.1371/journal.ppat.1000541
- 914 Martínez, J. L. (2008). Antibiotics and Antibiotic Resistance Genes in Natural Environments.  
915 *Science*, 321(5887), 365-367. doi:10.1126/science.1159483
- 916 Moore, F. B., Rozen, D. E., & Lenski, R. E. (2000). Pervasive compensatory adaptation in  
917 *Escherichia coli*. *Proc Biol Sci*, 267(1442), 515-522. doi:10.1098/rspb.2000.1030
- 918 Nichol, D., Rutter, J., Bryant, C., Hujer, A. M., Lek, S., Adams, M. D., . . . Scott, J. G. (2019).  
919 Antibiotic collateral sensitivity is contingent on the repeatability of evolution. *Nature  
920 Communications*, 10(1), 334. doi:10.1038/s41467-018-08098-6

- 921 O'Toole, G. A., & Kolter, R. (1998). Initiation of biofilm formation in *Pseudomonas fluorescens*  
922 WCS365 proceeds via multiple, convergent signalling pathways: a genetic analysis. *Mol*  
923 *Microbiol*, 28(3), 449-461.
- 924 O'Neill, J. (2016). TACKLING DRUG-RESISTANT INFECTIONS GLOBALLY: FINAL  
925 REPORT AND RECOMMENDATIONS. *Review on Antimicrobial Resistance*.
- 926 Oksanen, J., Blanchet, F. G., Friendly, M., Kindt, R., Pierre Legendre, McGlinn, D., . . .  
927 Wagner, H. (2018). Vegan: Community Ecology Package. R package version 2.5-3.  
928 <https://CRAN.R-project.org/package=vegan>.
- 929 Olivares Pacheco, J., Alvarez-Ortega, C., Alcalde Rico, M., & Martínez, J. L. (2017). Metabolic  
930 Compensation of Fitness Costs Is a General Outcome for Antibiotic-Resistant  
931 *Pseudomonas aeruginosa* Mutants Overexpressing Efflux Pumps. *MBio*,  
932 8(4), e00500-00517. doi:10.1128/mBio.00500-17
- 933 Olsen, I. (2015). Biofilm-specific antibiotic tolerance and resistance. *Eur J Clin Microbiol*  
934 *Infect Dis*, 34(5), 877-886. doi:10.1007/s10096-015-2323-z
- 935 Oz, T., Guvenek, A., Yildiz, S., Karaboga, E., Tamer, Y. T., Mumcuyan, N., . . . Toprak, E.  
936 (2014). Strength of selection pressure is an important parameter contributing to the  
937 complexity of antibiotic resistance evolution. *Mol Biol Evol*, 31(9), 2387-2401.  
938 doi:10.1093/molbev/msu191
- 939 Pal, C., Papp, B., & Lazar, V. (2015). Collateral sensitivity of antibiotic-resistant microbes.  
940 *Trends Microbiol*, 23(7), 401-407. doi:10.1016/j.tim.2015.02.009
- 941 Piechaud, M., & Second, L. (1951). [Studies of 26 strains of *Moraxella Iwoffii*]. *Ann Inst*  
942 *Pasteur (Paris)*, 80(1), 97-99.
- 943 Podnecky, N. L., Fredheim, E. G. A., Kloos, J., Sørum, V., Primicerio, R., Roberts, A. P., . . .  
944 Johnsen, P. J. (2018). Conserved collateral antibiotic susceptibility networks in diverse  
945 clinical strains of *Escherichia coli*. *Nature Communications*, 9(1), 3673.  
946 doi:10.1038/s41467-018-06143-y
- 947 Poltak, S. R., & Cooper, V. S. (2011). Ecological succession in long-term experimentally  
948 evolved biofilms produces synergistic communities. *ISME J*, 5(3), 369-378.  
949 doi:10.1038/ismej.2010.136
- 950 Pournaras, S., Koumaki, V., Gennimata, V., Kouskouni, E., & Tsakris, A. (2016). In Vitro  
951 Activity of Tigecycline Against *Acinetobacter baumannii*: Global Epidemiology and  
952 Resistance Mechanisms. *Adv Exp Med Biol*, 897, 1-14. doi:10.1007/5584\_2015\_5001
- 953 Ridenhour, B. J., Metzger, G. A., France, M., Gliniewicz, K., Millstein, J., Forney, L. J., & Top,  
954 E. M. (2017). Persistence of antibiotic resistance plasmids in bacterial biofilms. *Evol*  
955 *Appl*, 10(6), 640-647. doi:10.1111/eva.12480
- 956 Rosenfeld, N., Bouchier, C., Courvalin, P., & Perichon, B. (2012). Expression of the resistance-  
957 nodulation-cell division pump AdeIJK in *Acinetobacter baumannii* is regulated by  
958 AdeN, a TetR-type regulator. *Antimicrob Agents Chemother*, 56(5), 2504-2510.  
959 doi:10.1128/AAC.06422-11
- 960 Sackman, A. M., & Rokyta, D. R. (2018). Additive Phenotypes Underlie Epistasis of Fitness  
961 Effects. *Genetics*, 208(1), 339-348. doi:10.1534/genetics.117.300451
- 962 Salverda, M. L. M., Koomen, J., Koopmanschap, B., Zwart, M. P., & de Visser, J. (2017).  
963 Adaptive benefits from small mutation supplies in an antibiotic resistance enzyme. *Proc*  
964 *Natl Acad Sci U S A*, 114(48), 12773-12778. doi:10.1073/pnas.1712999114
- 965 Santos-Lopez, A., Bernabe-Balas, C., Ares-Arroyo, M., Ortega-Huedo, R., Hoefler, A., San  
966 Millan, A., & Gonzalez-Zorn, B. (2017). A Naturally Occurring Single Nucleotide  
967 Polymorphism in a Multicopy Plasmid Produces a Reversible Increase in Antibiotic  
968 Resistance. *Antimicrob Agents Chemother*, 61(2). doi:10.1128/AAC.01735-16
- 969 Stalder, T., & Top, E. (2016). Plasmid transfer in biofilms: a perspective on limitations and  
970 opportunities. *NPJ Biofilms Microbiomes*, 2. doi:10.1038/npjbiofilms.2016.22
- 971 Steenackers, H. P., Parijs, I., Foster, K. R., & Vanderleyden, J. (2016). Experimental evolution  
972 in biofilm populations. *FEMS Microbiol Rev*, 40(3), 373-397.  
973 doi:10.1093/femsre/fuw002
- 974 Su, X. Z., Chen, J., Mizushima, T., Kuroda, T., & Tsuchiya, T. (2005). AbeM, an H<sup>+</sup>-coupled  
975 *Acinetobacter baumannii* multidrug efflux pump belonging to the MATE family of

- 976 transporters. *Antimicrob Agents Chemother*, 49(10), 4362-4364.  
977 doi:10.1128/AAC.49.10.4362-4364.2005
- 978 Traverse, C. C., Mayo-Smith, L. M., Poltak, S. R., & Cooper, V. S. (2013). Tangled bank of  
979 experimentally evolved Burkholderia biofilms reflects selection during chronic  
980 infections. *Proc Natl Acad Sci U S A*, 110(3), E250-259. doi:10.1073/pnas.1207025110
- 981 Tseng, B. S., Zhang, W., Harrison, J. J., Quach, T. P., Song, J. L., Penterman, J., . . . Parsek, M.  
982 R. (2013). The extracellular matrix protects *Pseudomonas aeruginosa* biofilms by  
983 limiting the penetration of tobramycin. *Environ Microbiol*, 15(10), 2865-2878.  
984 doi:10.1111/1462-2920.12155
- 985 Turner, C. B., Marshall, C. W., & Cooper, V. S. (2018). Parallel genetic adaptation across  
986 environments differing in mode of growth or resource availability. *Evolution Letters*,  
987 2(4), 355-367. doi:doi:10.1002/evl3.75
- 988 Van den Bergh, B., Swings, T., Fauvart, M., & Michiels, J. (2018). Experimental Design,  
989 Population Dynamics, and Diversity in Microbial Experimental Evolution.  
990 *Microbiology and Molecular Biology Reviews*, 82(3), e00008-00018.  
991 doi:10.1128/mmbr.00008-18
- 992 Ventola, C. L. (2015). The antibiotic resistance crisis: part 1: causes and threats. *P T*, 40(4),  
993 277-283.
- 994 Vogwill, T., & MacLean, R. C. (2015). The genetic basis of the fitness costs of antimicrobial  
995 resistance: a meta-analysis approach. *Evol Appl*, 8(3), 284-295. doi:10.1111/eva.12202
- 996 Walters, M. C., 3rd, Roe, F., Bugnicourt, A., Franklin, M. J., & Stewart, P. S. (2003).  
997 Contributions of antibiotic penetration, oxygen limitation, and low metabolic activity to  
998 tolerance of *Pseudomonas aeruginosa* biofilms to ciprofloxacin and tobramycin.  
999 *Antimicrob Agents Chemother*, 47(1), 317-323.
- 1000 Wang, Y.-C., Huang, T.-W., Yang, Y.-S., Kuo, S.-C., Chen, C.-T., Liu, C.-P., . . . Lee, Y.-T.  
1001 (2018). Biofilm formation is not associated with worse outcome in *Acinetobacter*  
1002 *baumannii* bacteraemic pneumonia. *Scientific Reports*, 8(1), 7289. doi:10.1038/s41598-  
1003 018-25661-9
- 1004 Warner, D. M., Folster, J. P., Shafer, W. M., & Jerse, A. E. (2007). Regulation of the MtrC-  
1005 MtrD-MtrE efflux-pump system modulates the in vivo fitness of *Neisseria gonorrhoeae*.  
1006 *J Infect Dis*, 196(12), 1804-1812. doi:10.1086/522964
- 1007 Warner, W. A., Kuang, S. N., Hernandez, R., Chong, M. C., Ewing, P. J., Fleischer, J., . . . Xu,  
1008 H. H. (2016). Molecular characterization and antimicrobial susceptibility of  
1009 *Acinetobacter baumannii* isolates obtained from two hospital outbreaks in Los Angeles  
1010 County, California, USA. *BMC Infect Dis*, 16, 194. doi:10.1186/s12879-016-1526-y
- 1011 Wickham, H. (2007). Reshaping Data with the reshape Package. *Journal of Statistical Software*,  
1012 21(12), 1-20.
- 1013 Wickham, H. (2016). *Elegant Graphics for Data Analysis*. New York: Springer-Verlag.
- 1014 Wickham, H., François, R., Henry, L., & Müller, K. (2018). dplyr: A Grammar of Data  
1015 Manipulation. R package version 0.7.8. <https://CRAN.R-project.org/package=dplyr>.
- 1016 Wistrand-Yuen, E., Knopp, M., Hjort, K., Koskiniemi, S., Berg, O. G., & Andersson, D. I.  
1017 (2018). Evolution of high-level resistance during low-level antibiotic exposure. *Nat*  
1018 *Commun*, 9(1), 1599. doi:10.1038/s41467-018-04059-1
- 1019 Wolcott, R. D. (2017). Biofilms cause chronic infections. *J Wound Care*, 26(8), 423-425.  
1020 doi:10.12968/jowc.2017.26.8.423
- 1021 Wolcott, R. D., Rhoads, D. D., Bennett, M. E., Wolcott, B. M., Gogokhia, L., Costerton, J. W.,  
1022 & Dowd, S. E. (2010). Chronic wounds and the medical biofilm paradigm. *J Wound*  
1023 *Care*, 19(2), 45-46, 48-50, 52-43. doi:10.12968/jowc.2010.19.2.46966
- 1024 Yang, H., Hu, L., Liu, Y., Ye, Y., & Li, J. (2016). Detection of the plasmid-mediated quinolone  
1025 resistance determinants in clinical isolates of *Acinetobacter baumannii* in China. *J*  
1026 *Chemother*, 28(5), 443-445. doi:10.1179/1973947815y.0000000017
- 1027 Yen, P., & Papin, J. A. (2017). History of antibiotic adaptation influences microbial  
1028 evolutionary dynamics during subsequent treatment. *PLoS Biol*, 15(8), e2001586.  
1029 doi:10.1371/journal.pbio.2001586



- 1030 Yoon, E. J., Chabane, Y. N., Goussard, S., Snesrud, E., Courvalin, P., De, E., & Grillot-  
1031 Courvalin, C. (2015). Contribution of resistance-nodulation-cell division efflux systems  
1032 to antibiotic resistance and biofilm formation in *Acinetobacter baumannii*. *MBio*, *6*(2).  
1033 doi:10.1128/mBio.00309-15
- 1034 Zhao, X., & Drlica, K. (2002). Restricting the selection of antibiotic-resistant mutant bacteria:  
1035 measurement and potential use of the mutant selection window. *J Infect Dis*, *185*(4),  
1036 561-565. doi:10.1086/338571
- 1037
